# Demographic determinants of biometric heritability

Julia A. Barthold<sup>1,\*</sup>

Floriane Plard<sup>2,3,\*</sup>

Jean-Michel Gaillard<sup>3</sup>

Tim Coulson<sup>4</sup>

Shripad Tuljapurkar<sup>5</sup>

July 17, 2018

\* J.A.B and F.P. contributed equally to this work; 1. Max-Planck Odense Center on the Biodemography of Aging, Department of Public Health, University of Southern Denmark, Odense, 5000; 2. Swiss Ornithological Institute, CH-6204 Sempach, Switzerland; 3.UMR CNRS 5558, Biométrie et Biologie Evolutive, Université Claude Bernard Lyon 1, Villeurbanne Cedex, France; 4.Department of Zoology, University of Oxford, Oxford, OX1 3PS, UK; 5.Department of Biology, Stanford University, Stanford, CA 94305, USA  
Corresponding author; e-mail: [floriane.plard@univ-lyon1.fr](mailto:floriane.plard@univ-lyon1.fr)

*Running title:* Determinants of heritability

## Abstract

The response of quantitative characters to selection depends on their transmission from  
3 parents to offspring. A common estimate of this transmission is the biometric heritability  
defined as the slope of the regression of offspring phenotype on same-aged mid-parent  
phenotype (i.e. the ratio of the phenotypic parent-offspring covariance over the parental  
6 phenotypic variance). This slope is often interpreted as the percentage of phenotypic  
variation due to additive genetic effects after accounting for confounding factors such  
as environment, litter or parental effects. However, researchers seldom account for the  
9 possible influence of selection on this estimate. Here we study the effect on biometric  
heritability of fertility and viability selection, as well as phenotype ontogeny (growth)  
and inheritance from parents to offspring. We present exact formulas for the elasticities  
12 of biometric heritability in age-phenotype-structured integral projection models (IPMs),  
and illustrate these for two iteroparous long-lived species. We find that both viability  
and fertility selection can strongly affect heritability, mediated by growth and inheritance.  
15 Generally, demographic processes that result in parents reproducing at large phenotypes,  
regardless of their own birth phenotype, decrease heritability. Analysed at equilibrium,  
our models imply that a heritable character can show no response to selection, if parental  
18 phenotypes affect offspring phenotypes and if phenotypes develop with age. Our results  
further highlight the importance of accounting for demographic processes when estimating  
heritability.

21 *Keywords:* heritability, inheritance, parent-offspring regression, phenotypic variance,  
parent-offspring covariance, integral projection model, IPM, Soay sheep, roe deer, Trans-  
mission

## 24 Introduction

Evolutionary biologists seek to understand how traits evolve in natural systems. Predictions of trait evolution are derived from quantitative genetics theory (Falconer & Mackay, 27 1996). To evolve, a trait needs to vary, be under selection and transmitted to the next generation. A key measure of transmission, the parent-offspring phenotypic covariance, is usually interpreted as arising from genetic similarity between parents and their offspring. 30 The ratio of parent-offspring phenotypic covariance over parental variance is the slope of the linear association between parental and offspring phenotypic traits measured at the same point in the life cycle. Once potential confounding factors affecting offspring 33 phenotypic traits have been accounted for, this ratio is interpreted as the proportion of phenotypic variation attributable to additive genetic variation—the narrow-sense heritability, or  $h^2$ , of a trait (Falconer & Mackay, 1996; Kempthorne, 1957). The reason 36 underpinning this logic is that genotypes are inherited at birth and remain constant throughout life, with the offspring genotype expected to be intermediate between the genotypes of the two parents (Lynch & Walsh, 1998). Heritability enters the breeder’s 39 equation to predict shifts in the population mean of a quantitative character under selection from one generation to the next. However, this interpretation of the parent-offspring covariance is restrictive. It excludes non-genetic inheritance (Bonduriansky & Day, 2009; 42 Danchin et al., 2011) and ignores trait ontogeny. However, individuals must grow and be sexually mature before reproducing and the resulting parental conditions influence offspring phenotype (Mousseau & Fox 1998, Figure 1).

45 A key observation challenges the widespread use of the breeder’s equation to study evolution in the wild. Size-related traits are frequently heritable and under directional selection in free-living populations of animals and plants, but they do not evolve as 48 predicted by the breeder’s equation (Merilä et al., 2001). The reason for this is that many assumptions underlying this equation are likely violated in natural systems. For instance, incomplete or flawed pedigrees can bias the estimation of breeding values (Postma, 2006).

51 Furthermore, the component linked to the interaction between genes and environment  
cannot be estimated in empirical studies in the wild and is therefore often assumed to be  
negligible. Finally, the link between phenotype and fitness can be caused by a correlated  
54 but unknown environmental or phenotypic trait (Morrissey et al., 2010).

In contrast to the challenges met when applying the breeder's equation to predict  
trait development, eco-evolutionary demographers have developed data-driven popula-  
57 tion models (Integral projection models, IPM, Easterling et al. 2000) that match ob-  
served phenotypic change over time (Coulson et al., 2011; Smallegange & Coulson, 2012;  
Vindenes et al., 2014). However, these models do not comply with quantitative genetics  
60 theory (Chevin 2015, but see Coulson et al. 2017), they do not follow the genotype and  
do not assume that the phenotype is influenced solely by additive genetic and environ-  
mental effects. IPMs follow the phenotype distribution and its dynamics in populations.  
63 They include a purely phenotypic across-age notion of inheritance (Janeiro et al., 2016).  
In this way, IPMs capture maternal and environmental effects of phenotype transmis-  
sion through an inheritance function that links phenotype of the mother at reproduction  
66 to the phenotype of the offspring (see Fig. 1). Moreover, this approach explicitly in-  
cludes ontogeny so that a new-born first grows to reach a required size at maturity, then  
reproduces, and lastly transmits its phenotype to its offspring. Coulson et al. (2017)  
69 have recently demonstrated how IPMs can track the additive genetic and environmental  
component of the phenotype, similar to approaches used in quantitative genetic models.  
But here, we suggest studying how ontogeny and selection can influence the measure of  
72 heritability using IPMs tracking directly the phenotype dynamics.

As long as major challenges exist for the application of quantitative genetics theory  
to natural systems, and without discrediting one or the other approach, the aim of this  
75 paper is to study heritability using these data-driven population models in order to stay  
open to the question how other processes than genetic inheritance could affect estimates  
of heritability. We calculate heritability from the modelled phenotype distributions at

78 equilibrium as the ratio of parent-offspring phenotypic covariance over parental variance,  
which is the exact same mathematical definition of the slope of the parent-offspring re-  
gression as developed in quantitative genetics theory (Falconer & Mackay, 1996). While  
81 the estimate of the slope is usually corrected for non-genetic effects, when calculated from  
an IMP it explicitly includes both genetic and non-genetic mechanisms of inheritance.  
IPMs furthermore explicitly model ontogeny to estimate the parent-offspring covariance.  
84 To indicate that heritabilities reported here contain non-genetic mechanisms of inher-  
itance, and are affected by fertility and viability selection and growth, we denote the  
quantity as “biometric heritability” (after Jacquard, 1983).

87 To study biometric heritability, we begin with a general IPM that describes changes  
in a trait (e.g. body mass) with age. For any such IPM, we derive analytical expressions  
for biometric heritability and for the elasticity of heritability to changes in any model  
90 parameter (intercept and slope of the different functions constituting the IPM). Elasticity  
of heritability measures the proportional change in heritability caused by an infinitesimal  
change of one of the model parameter and is estimated using the derivative of heritability  
93 with respect to this trait over heritability. These expressions will apply to any IPM of this  
type, and can be extended to IPMs that describe multivariate traits. We apply our general  
results to analyse two published age-body mass-structured IPMs, one parameterised for  
96 Soay Sheep (*Ovis aries*) (Coulson et al., 2010) and one for roe deer (*Capreolus capreolus*)  
(Plard et al., 2015). In these iteroparous species, body mass is under positive selection and  
develops with age. Surviving parents produce offspring that inherit a birth phenotype,  
99 which may be a function of the environment and parental age, phenotype, and condition  
(Mousseau & Fox, 1998; Skibiél et al., 2009). As a consequence, the parent-offspring  
phenotypic covariance arises out of complex interactions between ontogeny, demography,  
102 and selection. We report and compare how the biometric heritability of body mass for  
both species depends on selection processes, growth, and inheritance. By doing this, we  
show how demographic processes could influence estimates of heritability.

## 105 Methods

The **biometric heritability**  $h^2$  of a phenotypic trait is the slope of the regression of offspring phenotype values  $Y_a$  (“offspring phenotype”) at age  $a$  on mid-parent phenotype values  $X_a$  (“parent phenotype”) at age  $a$  (Jacquard, 1983) (referred to as “heritability” from now on). We estimate heritability of traits at birth using phenotypic and life history information from all ages. Our approach can be used for traits measured at any age, which have to be the same for parents and offspring. Coulson et al. (2010) generate parent-offspring phenotype patterns using IPMs and estimate the regression slope of the phenotypes of offspring born to one parent cohort over its lifetime regressed on the phenotypes of parents at their own birth. The heritability can be calculated using the formula for a regression slope

$$b = \frac{\text{Cov}(Y_a X_a)}{\text{Var}(X_a)}. \quad (1)$$

If parents of only one sex are considered, the heritability  $h^2$  equals twice the slope  $b$ , since one parent only contributes half of the offspring genome (Falconer & Mackay, 1996). From (1), it follows that the **elasticity** of the biometric heritability, defined as the proportional change in  $b$ , is

$$E_b = \frac{\Delta b}{b} = \frac{\Delta \text{Cov}(Y_a X_a)}{\text{Cov}(Y_a X_a)} - \frac{\Delta \text{Var}(X_a)}{\text{Var}(X_a)}. \quad (2)$$

The **elasticity** of heritability  $E_b$  is the derivative of the heritability  $\Delta b$  with respect to one of the parameter of the model, divided by this heritability. The precise forms of the elasticity of heritability  $E_b$  depend on which model parameter is changed. The quantities in (1) and (2) can be derived for an age-phenotype-structured population model, where phenotype is a quantitative character whose phenotypic values are discrete elements of the vector  $\mathbf{z} = \{z_i\}$ . In the following, we describe how the quantities for calculating the

126 elasticity of heritability can be computed. Detailed derivations of the described quantities  
are given in the supplemental material (equations A1-A9).

## Stable cohort birth phenotype distribution

129 The age and phenotype structure of a population that experiences time-invariant fertility  
and mortality rates converges to a stable age and phenotype distribution with a growth  
rate  $r$  (Keyfitz & Caswell, 2005). Stable populations have therefore stable proportions of  
132 newborns in each phenotype class, here represented by a vector  $\mathbf{u} = \{u(i)\} \equiv \{u(z_i)\}$  and  
referred to as the **stable cohort birth phenotype distribution**, which contains all the  
newborns of a given year. Note that we set  $(\mathbf{e}^T \mathbf{u}) = 1$ , using the vector  $\mathbf{e}^T = (1, 1, \dots, 1)$ .

135 If we define for any  $r$  a renewal matrix

$$\mathbf{A}(r) = \sum_a e^{-ra} \mathbf{F}_a \mathbf{L}_a, \quad (3)$$

where  $\mathbf{F}_a$  is a matrix describing fertility for parents of age  $a$ , and  $\mathbf{L}_a$  is a matrix describing  
survivorship from birth to age  $a$  (both matrices are described in detail in the next section),  
138 then the stable cohort birth phenotype distribution  $\mathbf{u}$  and growth rate  $r$  are together  
determined by

$$\mathbf{A}(r) \mathbf{u} = \mathbf{u}. \quad (4)$$

For details on the renewal matrix and the stable cohort birth phenotype distributions see  
141 Steiner et al. (2014).

## Phenotype-demography matrices

**Fertility** of parents aged  $a$  is a matrix  $\mathbf{F}_a = \mathbf{D}_a \widehat{\mathbf{M}}_a$ , where  $\widehat{\mathbf{M}}_a$  is a diagonal matrix whose  
144  $(i, i)$  entry is the total number of offspring that a parent of phenotype  $z_i$  will produce  
at age  $a$ . The **inheritance** of the phenotype from a parent of phenotype  $z_i$  at age  $a$  to

offspring is captured in the parent-offspring phenotypic transition matrix  $\mathbf{D}_a$  whose  $(i, j)$   
147 element is

$$\begin{aligned} D_a(i, z) &\equiv D_a(z_i | z_j) && (5) \\ &= \text{Prob.}[\text{Offspring phenotype is } z_i | \text{Parental phenotype is } z_j \text{ at age } a]. \end{aligned}$$

Note that  $\mathbf{e}^T \mathbf{D}_a = \mathbf{e}^T$  so that the probabilities for the transitions out of one parental phenotype  $z_j$  sum to one.

150 **Survival and growth** together from age  $a$  to age  $a + 1$  are given by a matrix  $\mathbf{P}_a$  whose  $(i, j)$  element is

$$\begin{aligned} P_a(i, z) &\equiv P_a(z_i | z_j) && (6) \\ &= \text{Prob.}[\text{Alive at age } a + 1 \text{ with phenotype } z_i | \text{Alive at age } a \text{ with } z_j]. \end{aligned}$$

**Survivorship** from birth at age  $a = 0$  to any age  $a$  is a matrix  $\mathbf{L}_a$  whose  $(i, j)$  element is

$$\begin{aligned} L_a(i, j) &\equiv L_a(z_i | z_j) && (7) \\ &= \text{Prob.}[\text{Alive at age } a \text{ with phenotype } z_i | \text{Born age } 0 \text{ with } z_j]. \end{aligned}$$

## 153 **Parent-offspring covariance and parental variance**

In the first part of the appendix (A1) we derive a formula for the covariance between offspring phenotype  $Y$  and parent birth phenotype  $X$  that is computable in terms of  
156  $\mathbf{F}_a, \mathbf{L}_a$ , and  $\mathbf{u}$ . As a consequence, the parent-offspring phenotypic covariance arises out of complex interactions between ontogeny, demography, and selection.

In a stable age-phenotype-structured population, the **lifetime number of offspring**



159 produced by a birth cohort that has the stable cohort birth phenotype distribution  $\mathbf{u}$  is

$$K = \sum_a (\mathbf{e}^T \mathbf{F}_a \mathbf{L}_a \mathbf{u}) = \sum_a (\mathbf{e}^T \widehat{\mathbf{M}}_a \mathbf{L}_a \mathbf{u}). \quad (8)$$

Using this, the phenotype-demography matrices  $\widehat{\mathbf{M}}_a$ , and  $\mathbf{L}_a$ , and the stable cohort birth phenotype distribution  $\mathbf{u}$  as defined in (4), the **parent-offspring covariance** between  
162 offspring and parent birth phenotypes is given by

$$\text{Cov}(Y_0 X_0) = \frac{1}{K} \sum_a \left\{ \mathbf{e}^T \widehat{\mathbf{Z}} \mathbf{F}_a \mathbf{L}_a \left( \mathbf{I} - \mathbf{u} \mathbf{e}^T \frac{1}{K} \sum_a \widehat{\mathbf{M}}_a \mathbf{L}_a \right) \widehat{\mathbf{Z}} \mathbf{u} \right\}, \quad (9)$$

$$= \mathbf{e}^T \widehat{\mathbf{Z}} \mathcal{H} \left( \mathbf{I} - \mathbf{u} \mathbf{e}^T \frac{1}{K} \sum_a \widehat{\mathbf{M}}_a \mathbf{L}_a \right) \widehat{\mathbf{Z}} \mathbf{u}, \quad (10)$$

where  $\widehat{\mathbf{Z}}$  is a diagonal matrix of the phenotypic values  $\widehat{\mathbf{Z}} = \text{diag}(z_i)$ , and where we use, for brevity,

$$\mathcal{H} = \frac{1}{K} \sum_a \mathbf{F}_a \mathbf{L}_a. \quad (11)$$

165 Details on the derivations are given in the appendix A1, particularly in (A-14 to A-17).

The **variance in parent birth phenotype** is

$$\text{Var}(X_0) = \frac{1}{K} \sum_a (\mathbf{e}^T \widehat{\mathbf{M}}_a \mathbf{L}_a \widehat{\mathbf{Z}} \widehat{\mathbf{Z}} \mathbf{u}) - \frac{1}{K^2} \left( \sum_a \mathbf{e}^T \widehat{\mathbf{M}}_a \mathbf{L}_a \widehat{\mathbf{Z}} \mathbf{u} \right)^2. \quad (12)$$

168 Details on the derivation of the variance is given in the appendix A2, particularly in (A-18 to A-23).

## Computing the elasticity of heritability

A change in biometric heritability  $\Delta b$  occurs if we change the model parameters that  
171 govern the strength of the phenotype selection and transition processes by a small amount  $\epsilon > 0$ . This change was estimated by the derivative of  $b$  in relation to the parameter that

has changed. This causes changes in the phenotype-demography matrices

$$\mathbf{F}_a \mathbf{L}_a \rightarrow \mathbf{F}_a \mathbf{L}_a + \epsilon \Delta_a, \quad (13)$$

174 where  $\Delta$  represent the derivative of a matrix. In the following, we also use  $\Delta$  and  $\delta$  to represent the derivative of a number and a vector, respectively. The appendix A4 and A9 give the details on the computation of the changes in the phenotype-demography matrices  
177 with respect to changes in viability selection, fertility selection, growth, and inheritance.

The changes in (13) change the stable population so that the stable cohort birth phenotype distribution  $\mathbf{u}$  changes by  $\epsilon \delta_u$  (see A3, A6, A7 and A8 for the computation of  $\delta_u$ ).  
180 From here on, we leave off the  $\epsilon$  (constant proportional factor) since it multiplies every change. In addition to changes in  $\mathbf{u}$ , the parent-offspring covariance  $\text{Cov}(Y_0 X_0)$  changes by  $\Delta \text{Cov}(Y_0 X_0)$  and the variance in parent birth phenotype  $\text{Var}(X_0)$  by  $\Delta \text{Var}(X_0)$  (see  
183 A5 for details on the perturbations of the parent birth phenotype variance).

The perturbation of the parent-offspring covariance as given in (10) requires the perturbation of matrix  $\mathcal{H}$  (11), which in turn needs the perturbation of  $K$  (8). From (11)  
186 see that the change in  $\mathcal{H}$  is

$$\Delta_{\mathcal{H}} = - \left( \frac{\Delta_K}{K} \right) \mathcal{H} + \frac{[\sum_a \Delta_a]}{K}. \quad (14)$$

And from (8) we have

$$\Delta_K = \sum_a (\mathbf{e}^T \Delta_a \mathbf{u}) + \sum_a (\mathbf{e}^T \mathbf{F}_a \mathbf{L}_a) \delta_u \quad (15)$$

Putting these together, the change in parent-offspring covariance between offspring and

189 parent birth phenotypes using (10) and  $\delta_u$  (A3) is

$$\begin{aligned} \Delta\text{Cov}(Y_0 X_0) &= \mathbf{e}^T \widehat{\mathbf{Z}} [\Delta_{\mathcal{H}}] \left( \mathbf{I} - \mathbf{u} \mathbf{e}^T \frac{1}{K} \sum_a \widehat{\mathbf{M}}_a \mathbf{L}_a \right) \widehat{\mathbf{Z}} \mathbf{u} \\ &\quad + \mathbf{e}^T \widehat{\mathbf{Z}} \mathcal{H} \left( \mathbf{I} - \mathbf{u} \mathbf{e}^T \frac{1}{K} \sum_a \widehat{\mathbf{M}}_a \mathbf{L}_a \right) \widehat{\mathbf{Z}} \delta_u \\ &\quad - \mathbf{e}^T \widehat{\mathbf{Z}} \mathcal{H} \left( \frac{1}{K} \sum_a \mathbf{u} \mathbf{e}^T \Delta_{\widehat{\mathbf{M}}_a \mathbf{L}_a} \right) \\ &\quad + \frac{\delta_u K - \Delta_K \mathbf{u}}{K^2} \sum_a \mathbf{e}^T \widehat{\mathbf{M}}_a \mathbf{L}_a \widehat{\mathbf{Z}} \mathbf{u}. \end{aligned} \tag{16}$$

Finally, the change in parent birth phenotypic variance (Appendix A5) is

$$\begin{aligned} \Delta\text{Var}(X_0) &= \mathbf{e}^T \sum_a \left\{ \frac{\Delta_{\widehat{\mathbf{M}}_a \mathbf{L}_a} K - \Delta_K \widehat{\mathbf{M}}_a \mathbf{L}_a}{K^2} \widehat{\mathbf{Z}} \widehat{\mathbf{Z}} \mathbf{u} \right\} \\ &\quad + \frac{1}{K} \sum_a (\mathbf{e}^T \widehat{\mathbf{M}}_a \mathbf{L}_a \widehat{\mathbf{Z}} \widehat{\mathbf{Z}} \delta_u) \\ &\quad - 2 \frac{\mathbf{e}^T}{K} \sum_a \left\{ \frac{\Delta_{\widehat{\mathbf{M}}_a \mathbf{L}_a} K - \Delta_K \widehat{\mathbf{M}}_a \mathbf{L}_a}{K} \widehat{\mathbf{Z}} \mathbf{u} + \widehat{\mathbf{M}}_a \mathbf{L}_a \widehat{\mathbf{Z}} \delta_u \right\} \mathbf{z}^T \mathbf{u}. \end{aligned} \tag{17}$$

Using (10), (12), (16), and (17), we can now compute the biometric heritability in (1)

192 and its elasticity in (2).

We also compare our analytical framework to numerical evaluation of elasticities of heritability with respect to changes in the model parameters. We numerically computed the elasticities from simulations by adding  $10^{-5}$  to each model parameter, one at a time, dividing the resulting change in the perturbed elasticity by the unperturbed elasticity, and then scaling it back up by  $10^5$ . This approach is described in detail in Coulson et al. (2010).

We analyse the model at its equilibrium state when the phenotype distribution has stable, time-invariant proportions in each age and phenotype class. This stable phenotype distribution changes if model parameters are altered. As a consequence, changes in model parameters can affect heritability at population equilibrium by affecting one

of three phenotype distributions: the stable cohort at birth phenotype distribution, the  
204 stable parent (at own) birth phenotype distribution, or the offspring birth phenotype  
distribution. The offspring produced by a stable population in one time step has the  
stable cohort birth phenotype distribution. Each such cohort contains individuals who  
207 may become parents if they survive and reproduce. Which of these potential parents  
reproduce, and how often, during their lifetimes determines the stable parent (at own)  
birth phenotype distribution. The latter is shifted to higher phenotype values when com-  
210 pared to the stable cohort birth phenotype distribution, if viability and fertility selection  
are positive. Finally, the offspring born to one cohort of parents over their lifetimes form  
the offspring birth phenotype distribution.

## 213 **Application to Soay sheep and roe deer IPMs**

We computed the biometric heritability of body mass in Soay sheep and roe deer and  
the elasticities of heritability to changes in model parameters for two published age-  
216 phenotype-structured IPMs (Coulson et al., 2010; Plard et al., 2015). Both IPMs used  
data from the female component of the population and categorised those ages with sta-  
tistically indistinguishable fertility, survival, growth, and inheritance functions into age-  
219 classes. The Soay sheep IPM divided individuals into four age-classes: lambs (aged  
0 to  $< 1$ , census at 4 months old), yearlings (aged 1 to  $< 2$ ), adults (aged 2 to  $< 8$ ),  
and senescent individuals (aged 8+). Whereas the roe deer IPM distinguished three age-  
222 classes: yearlings (aged 0 to  $< 1$ , census at 8 month old), adults (aged 1 to  $< 7$ ), and  
senescent individuals (aged 7+). For consistency among the IPMs and the above nota-  
tion, where age 0 refers to age at birth (i.e. census age), we define the roe deer age-classes  
225 starting at age 0 to denote the census age of 8 months, instead of age 1 as in Plard et al.  
(2015). This is purely a question of notation. For both species, we calculate heritability  
for their respective census ages of 4 months in Soay sheep and 8 months in roe deer.

228 The IPM phenotype-demography matrices were constructed by predicting from the

relevant phenotype-demography functions. The functions were statistically determined using life history and body mass data while controlling for confounding temporal variation in demographic rates. The functions inferred, by body weight and age-class, were yearly probability of survival, yearly probability of recruitment, probability of twinning, mean and variance of annual growth, and mean and variance of parent-offspring body weight inheritance. The survival, probability of recruitment, and twinning rate functions were estimated with a logit transformation while the mean and the variance of the growth and the inheritance functions used linear functions. Every function has an intercept and a slope per age-class. The total number of model parameters is the total number of coefficients of all functions. For a detailed description of the construction of IPMs see Merow et al. (2014) or Rees et al. (2014).

We now provide a brief summary of the data. The feral population of Soay sheep lives on the Island of Hirta in the St. Kilda archipelago, Scotland, and fluctuates as a food-limited population between 600 and 2000 individuals, of which about one-third live in the 250ha study area (Clutton-Brock & Pemberton, 2004). The population has been studied in detail since 1985. During this time, life-history and body mass data were collected during the yearly capture and year-round censuses. A detailed description of the population and data collection protocols is provided elsewhere (Clutton-Brock & Pemberton, 2004).

The roe deer population of Trois Fontaines lives in an enclosed forest of 1360 ha in North Eastern France ( $48^{\circ}3'N$ ,  $2^{\circ}61'W$ ). The size of the population has been kept relatively constant around 250 individuals by yearly removals (mainly through exportation of captured individuals) except between 2001-2005 when an experimental manipulation of density was performed and population size peaked at 450 individuals. The population has been monitored by the Office National de la Chasse et de la Faune Sauvage since 1975. Each year, half of the population of roe deer is caught between December and March. Each individual is sexed and weighed. All individuals included in this study

are of known age. The population and the study site has been described in details by Gaillard et al. (1993, 2013).

## 258 **Results**

The estimated heritabilities of body mass were 0.20 for Soay sheep and 0.34 for roe deer. While the parent birth phenotypic variances (denominator used in the estimation  
261 of heritability) were similar (5.59 and 5.39 for roe deer and Soay sheep, respectively), the parent-offspring covariance (numerator) was smaller in Soay sheep (0.53) than in roe deer (0.94). This is because Soay sheep can give birth at 1 year of age and so give  
264 birth to offspring of different body masses at different ages, whereas roe deer give birth from 2 years of age onwards to more similar offspring each year. The elasticities of the heritabilities varied between -6% and 2.5%. Both the analytically and numerically  
267 calculated elasticities provided equivalent results (Figs. S1 and S2). In general, perturbing slopes had larger effects on heritability than perturbing intercepts (Figs. 2 and 3). In the following, we will discuss the analytically calculated elasticities with respect to changes  
270 in fertility and viability selection, growth, and inheritance. To understand the elasticities of heritability, we also discuss the underlying elasticities in the means and variances of the three phenotype distributions that contribute to determining heritability: the stable  
273 cohort birth phenotype distribution, the parent birth phenotype distribution, and the offspring birth phenotype distribution (Tables 1, S1, and S2).

### **Elasticities of heritability with respect to viability selection**

276 Increasing the slopes of the survival function and thus increasing survival and altering viability selection resulted in large negative elasticities of heritability for both species and almost all age-classes (Figs. 2 and 3). Changes to the slopes for the adult age-classes  
279 had the most pronounced effects. Increasing these slopes increased survival across all

phenotype values but decreased the strength of viability selection because these changes increased survival of small adults more than survival of large adults. This is because  
282 the survival probabilities predicted by the unperturbed logit survival models were already approaching the boundary of one for larger adults (Figs. 4, 5, also see Fig. S3 for a schematic of this “linearisation effect”). In contrast to this, increasing the survival  
285 slope for Soay sheep lambs, for example, increased survival and the strength of viability selection, meaning that survival increased more for larger lambs than for smaller lambs (Figs. S3 and 4).

288 Regardless of the direction of the change in viability selection, increasing the adult survival slopes decreased heritability because more individuals survived and grew to reproduce at larger size. This surplus of adult individuals reproducing at large phenotype  
291 values, and producing relatively large offspring, increased the mean offspring phenotype and decreased the variance among offspring. This meant that potential parents were larger and more similar at birth (Table 1). As a consequence, the variance in parent  
294 birth phenotype decreased. However, the covariance between parent and offspring birth phenotype decreased substantially. Due to the overall higher survival probabilities and the reduced viability selection, more parents with small birth phenotypes grew to large  
297 adult sizes where they gave birth to large offspring. Defined by the ratio of this covariance and the parent birth phenotypic variance, heritability overall decreased for both species as the survival slope increased (Table 1).

300 Increasing the survival slopes for Soay sheep lambs and yearlings had comparable effects (Table 1). However, perturbing the survival slope for roe deer yearlings had little effect because the decrease in the covariance between parent and offspring birth phenotype  
303 was relatively weak.

## Elasticities of heritability with respect to fertility selection

Changing fertility and fertility selection had much larger effects on heritability for Soay  
306 sheep than for roe deer (Figs. 2 and 3). For Soay sheep, fertility selection mostly operated  
through the probability of recruitment because the twinning rates were very low (Fig. 4).  
Another idiosyncrasy of the Soay sheep model was that the probability of recruitment  
309 for adults was similar across all phenotypes (Fig. 4). Therefore, fertility selection in the  
adult age-class was low. Introducing fertility selection by increasing the slope of this  
function by an infinitesimal change of about 0.01 had the largest effect on heritability of  
312 all perturbations for Soay sheep (Fig. 2). It decreased heritability by approximately 5 %.

Similarly to the effect of increasing the adult survival slope, increasing fertility and  
positive fertility selection among adult Soay sheep resulted in more adults reproducing at  
315 large phenotype values. This increased the mean of the stable cohort birth phenotype dis-  
tribution and decreased its variance (Table 1). The increase in fertility selection resulted  
in an increase in the mean parent birth phenotype, but the overall increase in fertility also  
318 led to smaller adults having higher fertility and therefore to an increase in the variance  
in birth phenotype among parents. The offspring birth phenotype increased due to the  
increase in fertility selection, and the variance in offspring birth phenotype decreased.  
321 The parent and offspring birth phenotypic covariance therefore decreased substantially,  
which resulted in a large decrease in heritability (Table 1). In Soay sheep, lambs have a  
small probability of recruitment (Fig. 4). Increasing this probability, and simultaneously  
324 increasing fertility selection by increasing the slope of the function, increased heritabil-  
ity (Fig. 2). The increase in the slope drastically increased the parent-offspring birth  
phenotypic covariance, because small-born parents were now more likely to give birth at  
327 small lamb sizes to small offspring. More lambs reproducing also caused a decrease in the  
mean and an increase in the variance of all three distributions: potential parents, parents,  
and offspring were on average smaller and less similar at birth. As a result, heritability  
330 increased (Table 1).



For roe deer, altering the probability of recruitment had less pronounced effects (Fig. 3). Increasing fertility and decreasing fertility selection for adults, due to the linearisation effect (Fig. S3), increased heritability. Supposedly, the decrease in fertility selection resulted in a decrease in the mean stable cohort birth phenotype because smaller adults had an increase in the probability of recruitment and a higher increase in the probability of recruitment than larger adults. At the same time, the variance in the stable cohort birth phenotype decreased; potential parents were smaller and more similar when compared to the unperturbed model. This smaller mean and variance translated into smaller means and variances for both the parent and offspring birth phenotype. The parent-offspring covariance increased, because parents that were born small, and therefore took longer to grow to the asymptotic size than large-born parents, had a higher probability of recruitment as small adults, resulting in small-born parents having a higher probability to give birth to small offspring (Table 1).

## Elasticities of heritability with respect to growth

Changing both intercepts or slopes of the functions that determined the variances in growth had little effect on heritability for both species (Figs. 2 and 3). These perturbations changed the variances in parent and offspring birth phenotype and in the parent-offspring covariance to similar proportions, which then overall had no effect on heritability (Tables S1 and S2). These findings even held for Soay sheep, where the growth variances have slopes that deviate from 0 (Fig. 4).

Increasing the slope of the mean growth function for adult and senescent Soay sheep had pronounced negative effects on heritability (Fig. 2). Increasing the slope of the mean growth function in an IPM has generally two consequences. First, all individuals of the relevant age-class attain faster their asymptotic body mass, with this acceleration being even larger for large individuals. Second, the mean maximum body mass increases because the mean growth rate function crosses the  $y = x$  line at higher phenotype values.

357 When the adult mean growth slope for Soay sheep was increased, individuals grew  
faster to larger phenotype values at which they had higher survival. This caused an  
increase in the number of adults reproducing at large phenotype values and therefore  
360 increased the mean size of potential parents, but also the variance in size among them  
(Table 1).

The increase in variance may have been caused by the increase in the asymptotic size  
363 of adults, which increased the range of phenotype values over which adults reproduce.  
This change in the phenotype mean and variance of the potential parent cohort cascaded  
through and led to similar increases in the mean and variance of parent and offspring  
366 birth phenotypes. The increase in the asymptotic size of adults, and the increase in how  
fast individuals grow to this size, increased the number of individuals that reproduce at  
large phenotype values regardless of their birth phenotype. Consequently, the covariance  
369 between parent and birth phenotype decreased, which divided by a much larger variance  
in birth phenotype, resulted in lower heritability (Table 1).

In order to understand how increasing the mean growth slope for senescent Soay sheep  
372 influenced heritability, it is important to notice that the slope for mean inheritance is neg-  
ative for senescent individuals; the larger they are, the smaller is their offspring (Fig. 4).  
As a result, shifting the asymptotic size for senescent individuals towards larger pheno-  
375 type values, at which individuals had higher probabilities of recruitment and survival yet  
gave birth to smaller offspring, decreased the mean and the variance in the stable cohort  
birth phenotype distribution. The variance further decreased because the variance of the  
378 growth function decreases with body mass in the senescent age-class. The decrease in  
the mean and variance in the stable cohort birth phenotype distribution was again fol-  
lowed by similar developments in the parent and offspring birth phenotype distributions.  
381 However, overall heritability decreased (Table 1) because the parent-offspring covariance  
decreased even more.

For roe deer, only increasing the growth mean slope for yearlings had a notable effect

384 on heritability, since most of the growth towards the asymptotic body mass occurs in this  
age class (Fig. 3). Increasing the slope of yearling growth resulted in individuals growing  
faster to larger sizes at which they recruited to the adult age-class. They therefore  
387 experienced higher probabilities of survival, recruitment, and twinning rates during the  
first time step as adults. Due to the positive slope of the mean inheritance function  
(Fig. 5), this increased the mean and decreased the variance in the stable cohort birth  
390 phenotype distribution. Since potential parents were larger and more similar at birth,  
plus they were exposed to higher growth rates during the yearling age-class, both parents  
and offspring were also larger and more similar in birth phenotype, which increased the  
393 parent-offspring covariance (Table 1). Divided by a smaller parental variance, this led to  
higher heritability.

## **Elasticities of heritability with respect to parent-offspring phe-** 396 **notype inheritance**

The only direct relationship between offspring and parent phenotype (at birth of offspring)  
is modelled by the inheritance function. Nevertheless, perturbing this relationship by  
399 increasing the slopes of the mean inheritance functions had only moderate effects on  
heritability (Figs. 2 and 3). Increasing the slope of the mean inheritance function for Soay  
sheep yearlings and roe deer adults increased the mean stable cohort birth phenotype and  
402 decreased the associated variance. It supposedly decreased the variance because both age-  
classes had high probabilities of recruitment for the upper part of the stable phenotype  
distribution of the respective age-class (Figs. 4 and 5). Offspring produced were therefore  
405 larger and more similar. Since potential parents started out larger and more similar, the  
mean birth phenotype of parents was also larger and its variance smaller. Since parents  
were larger, they gave birth to larger and more similar offspring. The covariance between  
408 parent and offspring phenotype increased, while the variance in parent birth phenotype  
decreased, resulting in higher heritabilities caused by these perturbations.

However, increasing the slope of the mean inheritance function for adult Soay sheep  
411 actually decreased heritability (Fig. 2) because it increased the variance of the parent birth  
distribution. Since both small and large adult Soay sheep have about the same number of  
offspring due to the probability of recruitment being almost constant, increasing the slope  
414 of the mean inheritance function shifted the mean of the stable cohort birth phenotype  
distribution to larger sizes while spreading out the distribution. Since the stable cohort  
was larger and less similar in birth phenotype, the mean and variance in the parent birth  
417 phenotype distribution also increased. The covariance between parent and offspring birth  
phenotype also increased, but less than the variance in parent birth phenotype, which  
overall resulted in a lower heritability.

## 420 Discussion

By studying two species of large vertebrates in an IPM framework, we have demonstrated  
how the effect of all four processes – viability and fertility selection, growth, and inheri-  
423 tance – on biometric heritability can be quantified and compared. Our results show that  
viability and fertility selection influence heritability more than growth and inheritance,  
which dampen or amplify the effect of selection. Interestingly, inheritance played the  
426 least important role. Our method allows us to understand if these processes influence  
heritability by influencing the phenotypic covariance among offspring and parents, the  
variance among parents, or both. Generally, processes that lead to individuals giving  
429 birth to offspring of different sizes decrease heritability. Accordingly, we estimated her-  
itability of body mass at first census age to be lower in Soay sheep than in roe deer.  
Within-individual variation in offspring body mass is 67% and 44% for Soay sheep and  
432 roe deer, respectively. While Soay sheep can reproduce at different sizes in different age  
classes, giving birth to offspring of different sizes, roe deer mostly reproduce at sizes close  
to the mean asymptotic body size, resulting in more similar offspring. In the following, we  
435 discuss our main findings and the use of IPMs to study heritability in free-living animal

populations. First, however, we summarise some general insights that provide guidance in distilling these insights from our varied results.

438 First, perturbing intercepts had smaller effects on heritability than perturbing slopes, because perturbing intercepts mostly affects the means of phenotype distributions, while perturbing slopes affects the means and the variances of phenotype distributions. Second, 441 perturbations of the same parameter, but for different age classes, do not always change processes in the same way. Increasing the slope of the survival function, for example, increased viability selection for Soay sheep lambs yet decreased it for adults. Indeed, the 444 slope of the survival function is not directly a measure of the strength of the viability selection. Their particular effects depend on the shape of the functions and on the stable age-class phenotype distributions (see the result part on Elasticities of heritability with respect to viability selection and Fig. S3). Third, the different functions interact. An 447 increase in viability selection, for example, increases mean offspring size depending on the slope of the mean inheritance function. Finally, the more the functions vary among 450 the different age classes, the less predictable are their interactions. This may explain why we see more and mostly stronger responses in heritability to perturbations for Soay sheep when compared to roe deer (Figs. 4 and 5).

### 453 **Effects of viability and fertility selection**

Decreasing viability selection generally decreased heritability, as we have observed for both Soay sheep and roe deer in the adult and senescent age classes. This is because more 456 parents of different birth phenotypes survive to grow and give birth to large offspring. In reality, however, strong changes in viability selection acting on adult Soay sheep and roe deer are unlikely to occur (Gaillard et al., 2000). More realistic is variation in viability 459 selection among young individuals such as Soay sheep lambs, which we have observed would result in a decrease in heritability. In both species, viability selection up until the census age (8 months in roe deer, 4 months in Soay sheep) is part of the fertility selection,

462 because the parental probabilities of recruitment and twinning include the probability for  
offspring of surviving to the census age. Increasing fertility selection had the strongest  
heritability-decreasing effect for Soay sheep. Many studies found that heritability is  
465 generally lower under poor than under favourable environmental conditions (reviewed  
in Charmantier & Garant, 2005; Merilä & Sheldon, 2001). Wilson et al. (2006) showed  
that additive genetic variance decreased with increased viability selection on offspring  
468 phenotype in Soay sheep. In line with their findings, we observed that increasing adult  
and senescent fertility selection, which includes viability selection on offspring before first  
census, decreased heritability. Moreover, given positive viability selection among adults,  
471 increasing fertility selection among adults is also likely to decrease directly heritability  
because it reduces the probability that small individuals reproduce.

## Effects of growth and inheritance

474 The effects of viability and fertility selection on heritability are mediated by ontogeny.  
If individuals grow slowly, then any effect of selection on heritability has more time  
to act via the still-growing individuals. If however individuals grow fast to large sizes,  
477 then selection has less opportunity to influence heritability. Therefore, we observed a  
decrease in heritability with an increase in the mean growth rate of Soay sheep adults.  
Furthermore, we found that fertility selection had less effect on heritability of roe deer  
480 than Soay sheep because roe deer were recruited at 8 months of age when most growth  
had already taken place ( $\sim 70\%$  of the asymptotic mass, Hewison et al., 2011).

Inheritance captures processes that directly relate variation in parental body condi-  
483 tion and other maternal effects to offspring birth phenotype. Despite it being the only  
direct relationship between parental and offspring phenotype, the effect of inheritance  
on heritability is small. The mean inheritance function determines the variation in off-  
486 spring phenotypes, which then results in the variation among parents through growth  
and selection processes. We found that increasing the slope of the mean inheritance

function always increased the parent-offspring covariance. Remarkably though, this did  
489 not always result in an increase in heritability. For Soay sheep adults, the increase in  
phenotypic variance among potential parents also resulted in an increase in the variance  
in parent birth phenotype, which overall decreased heritability. The variance around the  
492 mean inheritance function captures reproductive allocation. Changing this variance has  
little effect on heritability because it changes the variances in parent phenotype and the  
parent-offspring covariances to similar proportions. In some species such as wild boars, in-  
495 dividuals allocate resources differently to siblings as an evolutionary bet hedging strategy,  
called coin-flipping (Kaplan & Cooper, 1984), to minimise the variance in reproductive  
success (Gamelon et al., 2013). Our results show that this has no effect on heritability in  
498 roe deer and Soay sheep, but may play a role in species with larger litter sizes.

## **Evolutionary and demographic effects on heritability estimates**

Estimates of heritability for roe deer and soay sheep were within the range of heritabilities  
501 estimated from animal model (Soay sheep: 0.20 here vs 0.03-0.32 from animal model,  
Wilson et al. 2006; roe deer: 0.34 here vs. 0.07 and 0.44 in two other populations of  
roe deer, Quemere et. al, unpublished data). Because our model includes a growth  
504 and an inheritance function that link an offspring's phenotype at birth to its mother's  
phenotype at the age of reproduction (Chevin, 2015; Janeiro et al., 2016), it allows us to  
understand how and how much selection and growth can influence the parent-offspring  
507 regression. Heritability can increase both because the covariance among parents and  
offspring increases or because the total phenotypic variance among parents decreases. Our  
results show that demography influences always both the numerator and the denominator  
510 of this ratio. As illustrated by our results, the evolution of a phenotypic continuous trait  
is a complex interaction between transmission and selection. The pool of potential future  
parents used to quantify the total phenotypic variance and to estimate heritability is  
513 directly influenced by viability and fertility selection (Hadfield, 2008). The influence of

selection on heritability has already been recognized in quantitative genetics (Hadfield, 2008; Nakagawa & Freckleton, 2008; Steinsland et al., 2014). Heywood (2005) derived  
516 a theoretical decomposition of the evolution of a trait, taking selection into account. However, it remains difficult to quantify each component of the decomposition given the currently available data from natural systems. Given the large influence of selection in  
519 roe deer and Soay sheep, it might partly explain why the predictions of the breeder's equation are more accurate in lab or domestic populations with controlled selection than in wild populations where many and variable selective pressures can influence a trait  
522 (Bonnet et al., 2017). Thus, IPMs present a relevant approach to study the evolution of a continuous trait in natural systems, taking into account the interaction between environment and the dynamics of the trait.

525 According to quantitative genetics, the parent-offspring phenotypic covariance represents exclusively genetic similarity because the genotype does not develop with age. While this definition can be used as measuring heritability for traits that remain fixed  
528 for life, it is questionable for traits that develop with age. Indeed, parental effects often influence offspring body mass or size in addition to genetic and environmental effects (Mousseau & Fox, 1998). Parental effects may change according to parental age, condi-  
531 tion, and experience. As a result, offspring phenotype cannot be predicted from additive genetic and environmental effects only (Fig. 1). Under the assumption that body mass is determined by a genotype that remains constant throughout life plus some environ-  
534 mental variation, a regression slope of unity would be expected. However, the slope of the growth function, where body mass at age  $a$  is regressed against body mass at age  $a + 1$ , is often estimated to be about 0.7 in IPMs (Coulson et al., 2010; Plard et al.,  
537 2015). The two ways out of this conundrum are for body mass to be determined by different but correlated genetic effects at different ages (Chevin, 2015) or for developmental trajectories to be controlled by genetic effects. Research to date has revealed strong  
540 positive genetic covariances across ages (Wilson et al., 2005) suggesting that this high



genetic correlation across ages is not an explanation for the low regression slopes observed when consecutive body masses are regressed against one another. Instead such traits are likely strongly determined by the environment. Because the same genotype can attain different body masses in different environments, genotype-by-environment processes are also likely to be influential in size-related traits. Then, if developmental trajectories are genetically determined a useful approach is to break transmission down into contributions from growth increments, survival, reproduction and the correlation between parents and offspring. To better understand the evolution of phenotypic traits, we need to focus on the heritability of trajectories over life. In the future, our findings hopefully will spark further advances into understanding evolution in natural systems by challenging empiricists, eco-evolutionary, and quantitative geneticists to join forces.

## Acknowledgements

JAB acknowledges funding from the International Max Planck Research Network on Aging (MaxNetAging). TC acknowledges support from the NERC and an ERC advanced grant. ST was partly supported by US NIA grant R24AG039345. We thank Jason Matthiopoulos, Ben Sheldon, Michael Morrissey for helpful comments.

## Supporting information

**Appendix S1: Methods A1–A9** Details of the analytical framework.

**Table S1** Change in key population parameters when model parameters are perturbed (Soay sheep).

**Table S2** Change in key population parameters when model parameters are perturbed (roe deer).

**Figure S1** Comparison of the analytically and numerically computed elasticities of heritability for Soay sheep.

**Figure S2** Comparison of the analytically and numerically computed elasticities of heritability for roe deer.

<sup>567</sup> **Figure S3** Schematic of the linearisation effect.

**Code S1** R code for analytically computing heritability and its elasticities. Download from <http://tinyurl.com/gr8fgju>.

## 570 References

- Bonduriansky, R. & Day, T. 2009. Nongenetic inheritance and its evolutionary implications. *Annu. Rev. Ecol. Evol. Syst.* **40**: 103–125. doi:10.1146/annurev.ecolsys.39.110707.173441.
- 573
- Bonnet, T., Wandeler, P., Camenisch, G. & Postma, E. 2017. Bigger is fitter? quantitative genetic decomposition of selection reveals an adaptive evolutionary decline of body mass in a wild rodent population. *PLoS Biol.* **15**: e1002592.
- 576
- Charmantier, A. & Garant, D. 2005. Environmental quality and evolutionary potential: lessons from wild populations. *P. Roy. Soc. Lond. B Bio* **272**: 1415–1425.
- 579
- Chevin, L.M. 2015. Evolution of adult size depends on genetic variance in growth trajectories: a comment on analyses of evolutionary dynamics using integral projection models. *Methods Ecol. Evol.* **6**: 981–986.
- 582
- Clutton-Brock, T.H. & Pemberton, J.M. 2004. *Soay sheep: dynamics and selection in an island population*. Cambridge University Press, Cambridge.
- Coulson, T., Kendall, B.E., Barthold, J.A., Plard, F., Schindler, S., Ozgul, A. & Gaillard, J.M. 2017. Modeling adaptive and non-adaptive responses of populations to environmental change. *Am. Nat.* **190**: 313–336.
- 585
- Coulson, T., MacNulty, D.R., Stahler, D.R., vonHoldt, B., Wayne, R.K. & Smith, D.W. 2011. Modeling effects of environmental change on wolf population dynamics, trait evolution, and life history. *Science* **334**: 1275–1278.
- 588
- Coulson, T., Tuljapurkar, S. & Childs, D.Z. 2010. Using evolutionary demography to link life history theory, quantitative genetics and population ecology. *J. Anim. Ecol.* **79**: 1226–1240.
- 591

- Danchin, E., Charmantier, A., Champagne, F.A., Mesoudi, A., Pujol, B. & Blanchet,  
594 S. 2011. Beyond DNA: integrating inclusive inheritance into an extended theory of  
evolution. *Nat. Rev. Genet.* **12**: 475–486.
- Easterling, M., Ellner, S. & Dixon, P. 2000. Size-specific sensitivity: applying a new  
597 structured population model. *Ecology* **81**: 694–708.
- Falconer, D.S. & Mackay, T.F. 1996. *Introduction to quantitative genetics*, 4th edn.  
Benjamin Cummings, Harlow.
- 600 Gaillard, J.M., Delorme, D., Boutin, J.M., Van Laere, G., Boisaubert, B. & Pradel, R.  
1993. Roe deer survival patterns - a comparative-analysis of contrasting populations.  
*J. Anim. Ecol.* **62**: 778–791.
- 603 Gaillard, J.M., Festa-Bianchet, M., Yoccoz, N., Loison, A. & Toigo, C. 2000. Temporal  
variation in fitness components and population dynamics of large herbivores. *Annu.*  
*Rev. Ecol. Syst.* **31**: 367–393.
- 606 Gaillard, J.M., Hewison, A.J.M., Klein, F., Plard, F., Douhard, M., Davison, R. &  
Bonenfant, C. 2013. How does climate change influence demographic processes of  
widespread species? Lessons from the comparative analysis of contrasted populations  
609 of roe deer. *Ecol. Lett.* **16**: 48–57.
- Gamelon, M., Gaillard, J.M., Baubet, E., Devillard, S., Say, L., Brandt, S. & Gimenez,  
O. 2013. The relationship between phenotypic variation among offspring and mother  
612 body mass in wild boar: evidence of coin-flipping? *J. Anim. Ecol.* **82**: 937–945.
- Hadfield, J.D. 2008. Estimating evolutionary parameters when viability selection is op-  
erating. *P. Roy. Soc. Lond. B Bio* **275**: 723–734.
- 615 Hewison, A.J.M., Gaillard, J.M., Delorme, D., Van Laere, G., Amblard, T. & Klein, F.  
2011. Reproductive constraints, not environmental conditions, shape the ontogeny of  
sex-specific mass-size allometry in roe deer. *Oikos* **120**: 1217–1226.

- 618 Heywood, J.S. 2005. An exact form of the breeder's equation for the evolution of a quantitative trait under natural selection. *Evolution* **59**: 2287–2298.
- Jacquard, A. 1983. Heritability: one word, three concepts. *Biometrics* **39**: 465–477.
- 621 Janeiro, M.J., Coltman, D.W., Festa-Bianchet, M., Pelletier, F. & Morrissey, M.B. 2016. Towards robust evolutionary inference with integral projection models. *J. Evol. Biol.* **30**: 270–288.
- 624 Kaplan, R.H. & Cooper, W.S. 1984. The evolution of developmental plasticity in reproductive characteristics: an application of the “adaptive coin-flipping” principle. *Am. Nat.* **123**: 393–410.
- 627 Kempthorne, O. 1957. *An introduction to genetic statistics*. Wiley, New York.
- Keyfitz, N. & Caswell, H. 2005. *Applied mathematical demography*, 3rd edn. Springer Verlag, New York.
- 630 Lynch, M. & Walsh, B. 1998. *Genetics and analysis of quantitative traits*. Sinauer Associates, Sunderland (MA).
- Merilä, J. & Sheldon, B.C. 2001. Avian quantitative genetics. In: *Current ornithology* (V. Nolan Jr & C.F. Thompson, eds), pp. 179–255. Springer.
- 633 Merilä, J., Sheldon, B.C. & Kruuk, L. 2001. Explaining stasis: microevolutionary studies in natural populations. *Genetica* **112**: 199–222.
- 636 Merow, C., Latimer, A.M., Wilson, A.M., McMahon, S.M., Rebelo, A.G. & Silander, J.A., Jr 2014. On using integral projection models to generate demographically driven predictions of species' distributions: development and validation using sparse data.
- 639 *Ecography* **37**: 1167–1183.
- Morrissey, M.B., Kruuk, L.E.B. & Wilson, A.J. 2010. The danger of applying the breeder's equation in observational studies of natural populations. *J. Evol. Biol.* **23**: 2277–2288.

- 642 Mousseau, T.A. & Fox, C.W. 1998. The adaptive significance of maternal effects. *Trends Ecol. Evol.* **13**: 403–407.
- Nakagawa, S. & Freckleton, R.P. 2008. Missing inaction: the dangers of ignoring missing  
645 data. *Trends Ecol. Evol.* **23**: 592–596.
- Plard, F., Gaillard, J.M., Coulson, T., Delorme, D., Warnant, C., Michallet, J., Tuljapurkar, S., Krishnakumar, S. & Bonenfant, C. 2015. Quantifying the influence of  
648 measured and unmeasured individual differences on demography. *J. Anim. Ecol.* **84**: 1434–1445.
- Postma, E. 2006. Implications of the difference between true and predicted breeding  
651 values for the study of natural selection and micro-evolution. *J. Evol. Biol.* **19**: 309–320.
- Rees, M., Childs, D.Z. & Ellner, S.P. 2014. Building integral projection models: a user’s  
654 guide. *J. Anim. Ecol.* **83**: 528–545.
- Skibieli, A.L., Dobson, F.S. & Murie, J.O. 2009. Maternal influences on reproduction in two populations of columbian ground squirrels. *Ecol. Monogr.* **79**: 325–341.
- 657 Smallegange, I.M. & Coulson, T. 2012. Towards a general, population-level understanding of eco-evolutionary change. *Trends Ecol. Evol.* **28**: 143–148.
- Steiner, U.K., Tuljapurkar, S. & Coulson, T. 2014. Generation time, net reproductive  
660 rate, and growth in stage-age-structured populations. *Am. Nat.* **183**: 771–783.
- Steinsland, I., Larsen, C.T., Roulin, A. & Jensen, H. 2014. Quantitative genetic modeling and inference in the presence of nonignorable missing data. *Evolution* **68**: 1735–1747.
- 663 Vindenes, Y., Edeline, E., Ohlberger, J., Langanen, Ø., Winfield, I.J., Stenseth, N.C. & Vøllestad, L.A. 2014. Effects of climate change on trait-based dynamics of a top predator in freshwater ecosystems. *Am. Nat.* **183**: 243–256.

- 666 Wilson, A.J., Kruuk, L.E.B. & Coltman, D.W. 2005. Ontogenetic patterns in heritable variation for body size: Using random regression models in a wild ungulate population. *Am. Nat.* **166**: E177–E192.
- 669 Wilson, A.J., Pemberton, J.M., Pilkington, J.G., Coltman, D., Mifsud, D.V., Clutton-Brock, T.H. & Kruuk, L.E.B. 2006. Environmental coupling of selection and heritability limits evolution. *PLoS Biol.* **4**: e216–6.

672 **Figures and Tables**

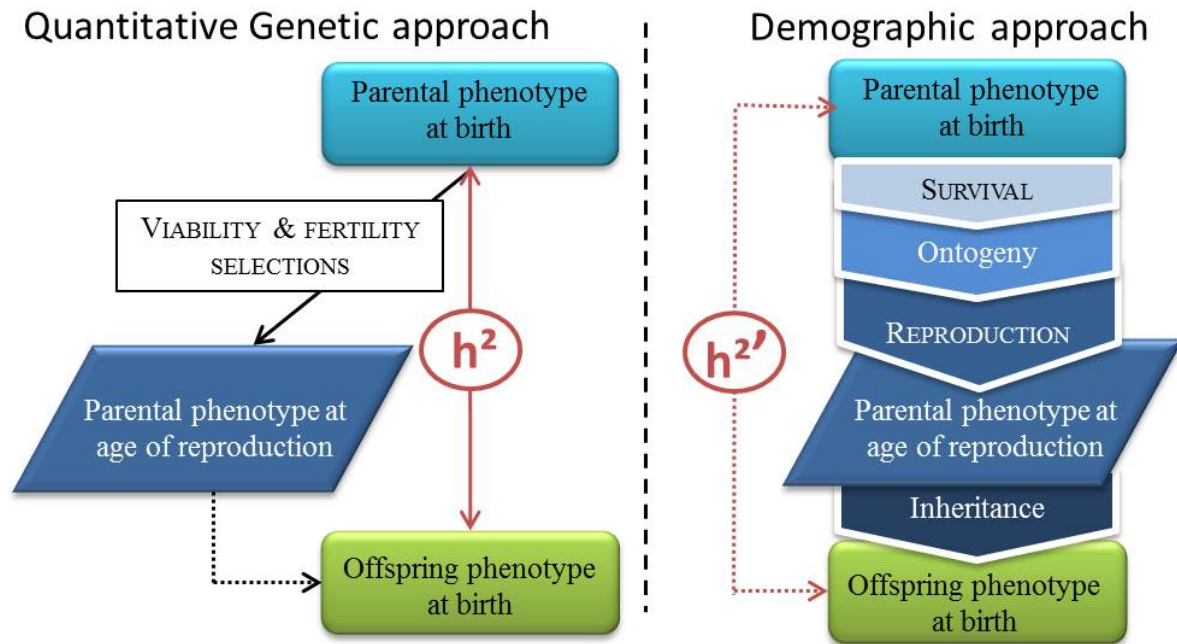

Figure 1: Differences between heritabilities directly measured from data and parent-offspring regression ( $h^2$ ) and derived from IPMs ( $h^{2'}$ ). In the demographic approach, survival and ontogeny covary during the growing stage.



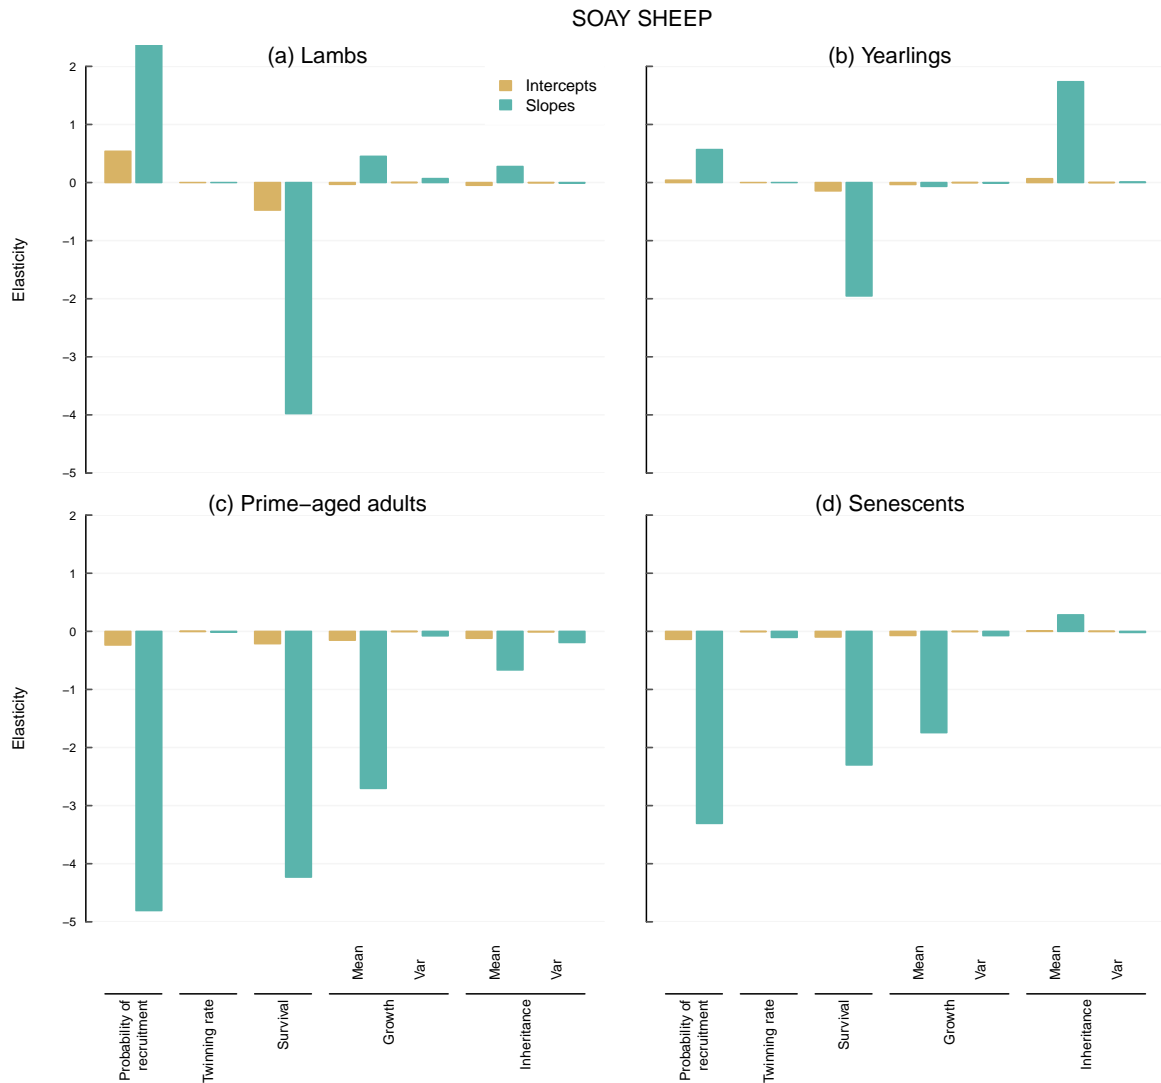

Figure 2: The analytically derived elasticities of heritability with respect to changes in the model parameters of the Soay sheep IPM.

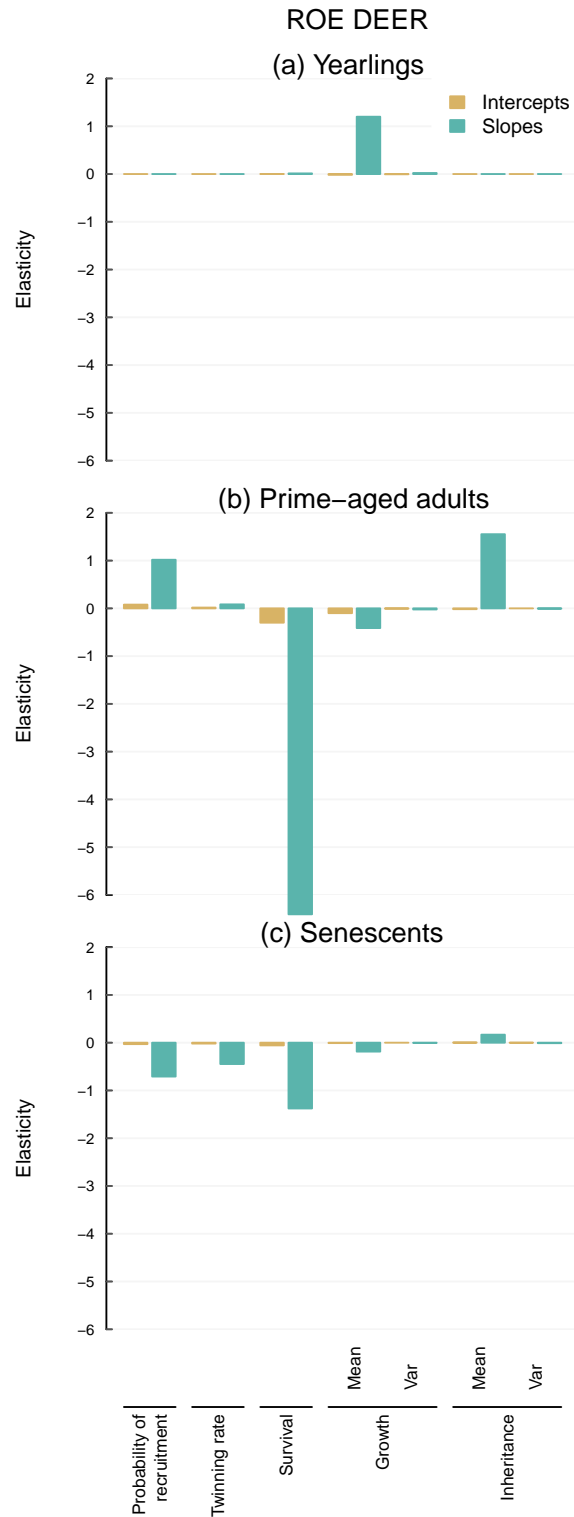

Figure 3: The analytically derived elasticities of heritability with respect to changes in the model parameters of the roe deer IPM.

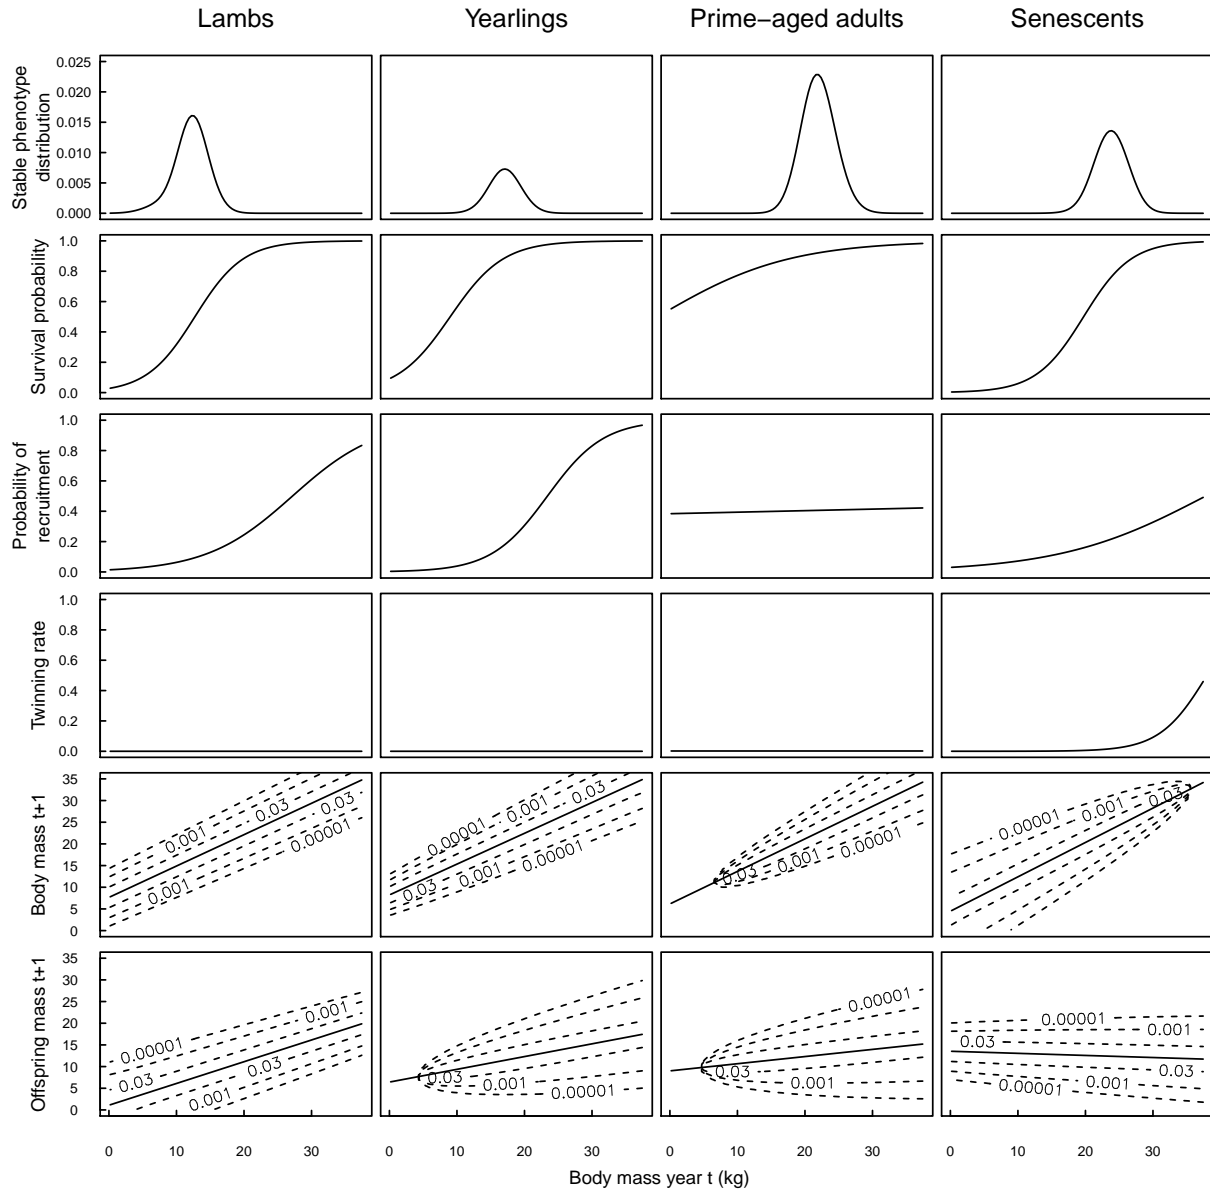

Figure 4: The phenotype-demography relationships used to parameterise the matrices in the IPM and the predicted stable phenotype distributions for Soay sheep. The age-class phenotype distributions together sum up to 1. For the phenotype-demography functions, lines represent predictions from regressions and dashed contours distributions around the mean.

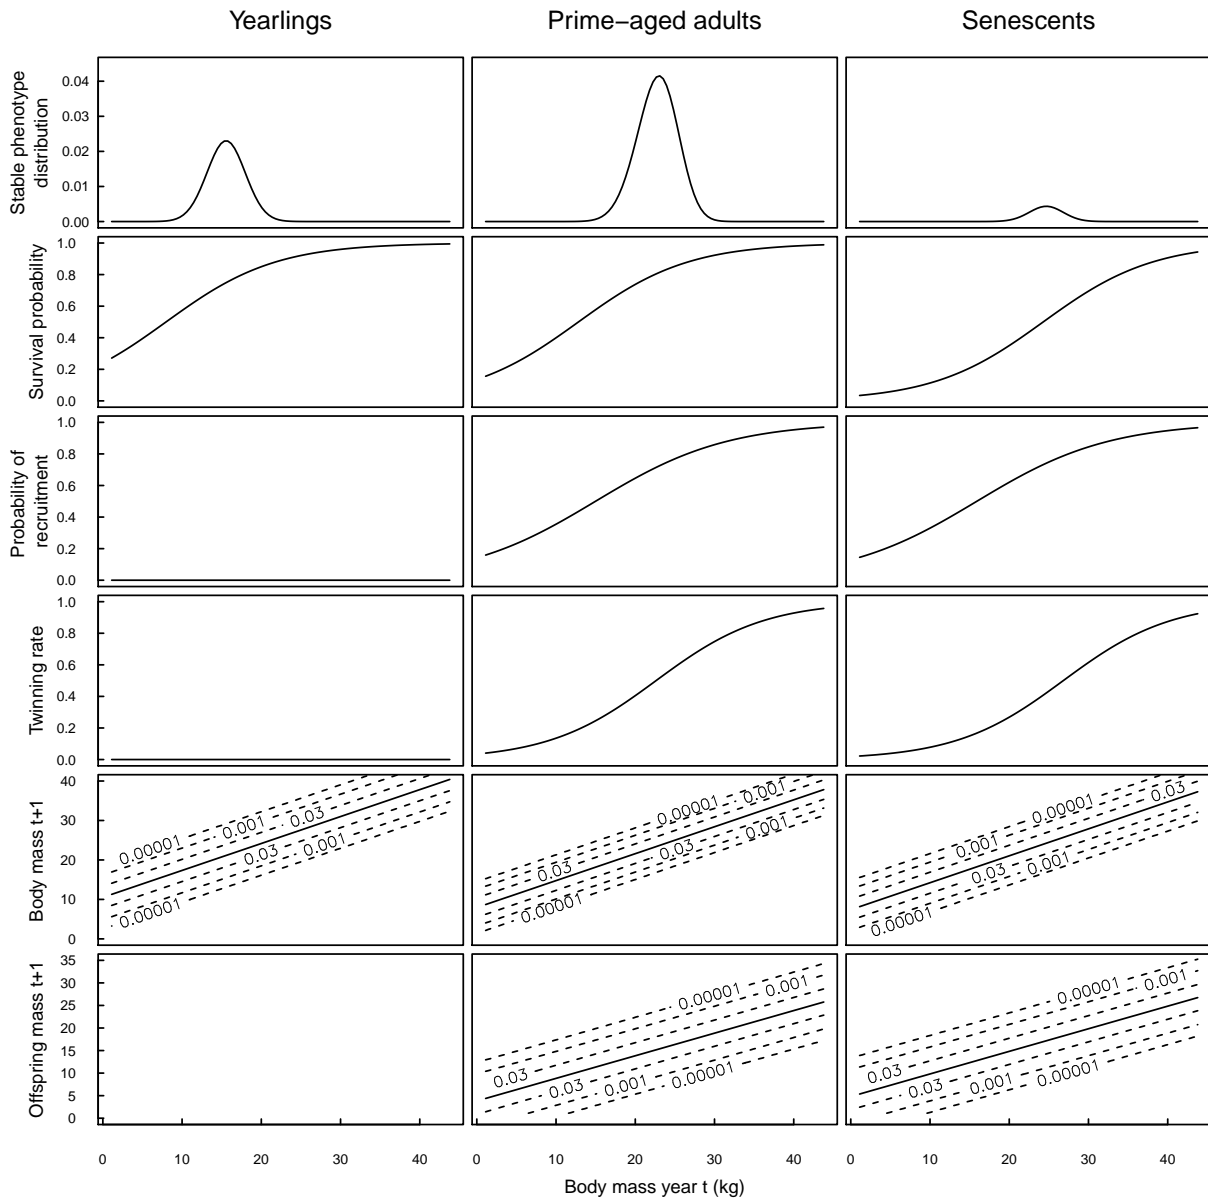

Figure 5: The phenotype-demography relationships used to parameterise the matrices in the IPM and the predicted stable phenotype distributions for roe deer. The age-class phenotype distributions together sum up to 1. For the phenotype-demography functions, lines represent predictions from regressions and dashed contours distributions around the mean. Roe deer yearlings do not reproduce.

Table 1: Change in key population parameters (%): expected and variance values of the stable cohort phenotype distribution ( $X_{c_0}$ ), the stable parent (at own) birth phenotype distribution ( $X_0$ ), and offspring birth phenotype distribution ( $Y_0$ ) when selected model parameters are perturbed (see Tables S1 and S2 for perturbations of all parameters). Note that shown values were calculated numerically by adding 0.01 to model parameters.

|            |           | $\mathcal{E}(X_{c_0})$ | $\text{Var}(X_{c_0})$ | $\mathcal{E}(X_0)$ | $\text{Var}(X_0)$ | $\mathcal{E}(Y_0)$ | $\text{Var}(Y_0)$ | $\text{Cov}(Y_0X_0)$ | $h^2$ | Effect <sup>†</sup> |
|------------|-----------|------------------------|-----------------------|--------------------|-------------------|--------------------|-------------------|----------------------|-------|---------------------|
| Soay sheep | SurvSlpL* | 0.00                   | -0.30                 | -0.15              | -0.71             | 0.15               | -1.24             | -4.38                | -3.69 | --                  |
|            | SurvSlpY  | 0.01                   | -0.09                 | -0.07              | 0.05              | 0.05               | -0.38             | -1.73                | -1.79 | -                   |
|            | SurvSlpA  | 0.04                   | -0.14                 | -0.01              | -0.11             | 0.15               | -0.94             | -3.75                | -3.65 | --                  |
|            | PrSlpL    | -0.41                  | 2.84                  | -0.13              | 1.37              | -0.35              | 2.59              | 4.53                 | 3.12  | ++                  |
|            | PrSlpA    | 0.15                   | -0.03                 | 0.14               | 0.11              | 0.40               | -1.58             | -4.11                | -4.21 | --                  |
|            | GrMSlpA   | 0.30                   | 1.55                  | 0.39               | 2.01              | 0.38               | 0.90              | -0.71                | -2.67 | --                  |
|            | GrMSlpS   | -0.04                  | -0.15                 | -0.03              | -0.14             | -0.01              | -0.57             | -2.09                | -1.95 | -                   |
|            | InMSlpY   | 0.13                   | -0.10                 | 0.09               | -0.29             | 0.12               | -0.17             | 1.45                 | 1.75  | +                   |
|            | InMSlpA   | 1.30                   | 2.55                  | 1.25               | 2.13              | 1.35               | 1.87              | 1.52                 | -0.60 | -                   |
| roe deer   | SurvSlpY  | -0.11                  | 0.00                  | -0.17              | -0.12             | -0.03              | 0.07              | -0.09                | 0.02  | 0                   |
|            | SurvSlpA  | 0.13                   | -0.13                 | 0.02               | -0.16             | 0.36               | -0.10             | -6.02                | -5.87 | --                  |
|            | PrSlpA    | -0.27                  | -0.14                 | -0.29              | -0.15             | -0.16              | -0.03             | 0.86                 | 1.01  | +                   |
|            | GrMSlpY   | 0.32                   | -0.68                 | 0.28               | -0.69             | 0.30               | -0.72             | 0.50                 | 1.21  | +                   |
|            | InMSlpA   | 1.64                   | -0.71                 | 1.51               | -0.84             | 1.54               | -1.33             | 0.70                 | 1.56  | +                   |

\* Model parameter labels are written in CamelCase forming compounds of the following abbreviations in order of appearance: survival (Surv), slope (Slp), lambs (L), yearlings (Y), adults (A), probability of recruitment (Pr), growth mean (GrM), senescents (S), inheritance mean (InM). <sup>†</sup>Effect size classification based on the elasticities of  $h^2$ : minimum to  $-2$  (--),  $-2$  to  $0.25$  (-),  $0.25$  to  $+0.25$  (0),  $0.25$  to  $2$  (+),  $2$  to maximum (++) .

## Supporting Information

### Appendix S1: Methods

#### 675 A1 Parent-offspring covariance

The expected birth phenotype  $Y_0$  of offspring born to parents of age  $a$  and phenotype  $X_a$  can be described by fitting a model of the form

$$\mathcal{E}[Y_0|X_a] = \alpha_a + \beta_a X_a. \quad (\text{A-1})$$

678 The expected offspring birth phenotype  $Y_0$  produced by a parent of age  $a$  and phenotype  $z_i$  can also be calculated from the parent-offspring phenotype transition matrix as

$$\mathcal{E}[Y_0|X_a = z_j] = \sum_i z_i D_a(i, j), \quad (\text{A-2})$$

and so it follows that

$$\mathbf{z}^T \mathbf{D}_a = \mathbf{e}^T \widehat{\mathbf{Z}} \mathbf{D}_a = \alpha_a \mathbf{e}^T + \beta_a \mathbf{z}^T. \quad (\text{A-3})$$

681 Since the lifetime production of offspring by a birth cohort is given by (8) in the main article, the probability that a newborn has a parent of age  $a$  is

$$\phi_a = \frac{\mathbf{e}^T \mathbf{F}_a \mathbf{L}_a \mathbf{u}}{K} = \frac{\mathbf{e}^T \widehat{\mathbf{M}}_a \mathbf{L}_a \mathbf{u}}{K}. \quad (\text{A-4})$$

To derive a formula for the covariance between offspring birth phenotype  $Y_0$  and parent  
684 birth phenotype  $X_0$  that is computable in terms of  $\mathbf{F}_a$ ,  $\mathbf{L}_a$ , and  $\mathbf{u}$ , we first derive the same covariance in terms of  $\phi_a$ ,  $\alpha_a$ , and  $\beta_a$ . Consider parents of age  $a$  and use (A-1) to see

that

$$E(Y_0 \mid \text{parent is age } a) = \alpha_a + \beta_a \mathcal{E}(X_a). \quad (\text{A-5})$$

687 Hence, for lifetime reproduction, writing  $\bar{\alpha} = \sum_a \phi_a \alpha_a$ ,

$$\mathcal{E}(Y_0) = \bar{\alpha} + \sum_a \phi_a \beta_a \mathcal{E}(X_a), \quad (\text{A-6})$$

$$\mathcal{E}(Y_0 X_0) = \bar{\alpha} \mathcal{E}(X_0) + \sum_a \phi_a \beta_a \mathcal{E}(X_a X_0). \quad (\text{A-7})$$

Using (A-6) and (A-7) the formula for the offspring-parent phenotype covariance in terms of the linear relationship in (A-1) is

$$\text{Cov}(Y_0 X_0) = \sum_a \phi_a \beta_a \text{Cov}(X_a X_0). \quad (\text{A-8})$$

690 Next, to make the covariance computable in terms of our phenotype-demography matrices, the joint distribution of parent phenotype  $X_a$  at age  $a$  and parent birth phenotype  $X_0$  is

$$\text{Prob.}[X_a = w_2, X_0 = w_1] = \frac{M_a(w_2) L_a(w_2 \mid w_1) u(w_1)}{(\mathbf{e}^T \widehat{\mathbf{M}}_a \mathbf{L}_a \mathbf{u})}. \quad (\text{A-9})$$

693 So given parents of age  $a$  with phenotype  $X_a$  and birth phenotype  $X_0$ ,

$$\mathcal{E}(X_a) = \frac{\mathbf{e}^T \widehat{\mathbf{Z}} \widehat{\mathbf{M}}_a \mathbf{L}_a \mathbf{u}}{(\mathbf{e}^T \widehat{\mathbf{M}}_a \mathbf{L}_a \mathbf{u})}, \quad (\text{A-10})$$

$$\mathcal{E}(X_a X_0) = \frac{\mathbf{e}^T \widehat{\mathbf{Z}} \widehat{\mathbf{M}}_a \mathbf{L}_a \widehat{\mathbf{Z}} \mathbf{u}}{(\mathbf{e}^T \widehat{\mathbf{M}}_a \mathbf{L}_a \mathbf{u})}, \quad (\text{A-11})$$

The joint distribution of offspring birth phenotype, parental phenotype at age  $a$ , and parent birth phenotype is

$$\text{Prob. } [Y_0 = W_3, X_a = w_2, X_0 = w_1] = \frac{D_a(w_3 | w_2) M_a(w_2) L_a(w_2 | w_1) u(w_1)}{(\mathbf{e}^T \mathbf{F}_a \mathbf{L}_a \mathbf{u})}. \quad (\text{A-12})$$

696 So we have

$$\mathcal{E}(Y_0) = \sum_a \phi_a \frac{\mathbf{e}^T \widehat{\mathbf{Z}} \mathbf{F}_a \mathbf{L}_a \mathbf{u}}{(\mathbf{e}^T \mathbf{F}_a \mathbf{L}_a \mathbf{u})}, \quad (\text{A-13})$$

$$= \frac{1}{K} \sum_a \{\mathbf{e}^T \widehat{\mathbf{Z}} \mathbf{F}_a \mathbf{L}_a \mathbf{u}\}. \quad (\text{A-14})$$

Next we have

$$\mathcal{E}(Y_0 X_0) = \frac{1}{K} \sum_a \{\mathbf{e}^T \widehat{\mathbf{Z}} \mathbf{F}_a \mathbf{L}_a \widehat{\mathbf{Z}} \mathbf{u}\}. \quad (\text{A-15})$$

Now we use (A-14), (A-15), and (A-21) to obtain (10) in the main article, which is a  
699 formula for the parent-offspring birth phenotype covariance that is computable in terms of the phenotype-demography matrices.

$$\text{Cov}(Y_0 X_0) = \mathcal{E}(Y_0 X_0) - \mathcal{E}(Y_0) \mathcal{E}(X_0), \quad (\text{A-16})$$

$$= \frac{1}{K} \sum_a \left\{ \mathbf{e}^T \widehat{\mathbf{Z}} \mathbf{F}_a \mathbf{L}_a \widehat{\mathbf{Z}} \mathbf{u} - (\mathbf{e}^T \widehat{\mathbf{Z}} \mathbf{F}_a \mathbf{L}_a \mathbf{u}) \left( \frac{1}{K} \sum_a \mathbf{e}^T \widehat{\mathbf{M}}_a \mathbf{L}_a \widehat{\mathbf{Z}} \mathbf{u} \right) \right\}, \quad (\text{A-17})$$

$$= \frac{1}{K} \sum_a \left\{ \mathbf{e}^T \widehat{\mathbf{Z}} \mathbf{F}_a \mathbf{L}_a \left( \mathbf{I} - \mathbf{u} \mathbf{e}^T \frac{\sum_a \widehat{\mathbf{M}}_a \mathbf{L}_a}{K} \right) \widehat{\mathbf{Z}} \mathbf{u} \right\}, \quad (9)$$

$$= \mathbf{e}^T \widehat{\mathbf{Z}} \mathcal{H} \left( \mathbf{I} - \mathbf{u} \mathbf{e}^T \frac{\sum_a \widehat{\mathbf{M}}_a \mathbf{L}_a}{K} \right) \widehat{\mathbf{Z}} \mathbf{u}. \quad (10)$$



## A2 Parent birth phenotype variance

702 In computing the variance, we need to account for the dispersion of lifetime reproduction  
 across different ages. The parent cohort is born with the stable cohort birth phenotype  
 distribution  $\mathbf{u}$ . From (A-9) it follows that for parents aged  $a$  their average birth phenotype  
 705 is

$$\mathcal{E}(X_0^a) = \sum_{w_2} \sum_{w_1} w_1 \text{Prob.}[X_a = w_2, X_0 = w_1].$$

Therefore,

$$\mathcal{E}(X_0^a) = \frac{\mathbf{e}^T \widehat{\mathbf{M}}_a \mathbf{L}_a \widehat{\mathbf{Z}} \mathbf{u}}{(\mathbf{e}^T \widehat{\mathbf{M}}_a \mathbf{L}_a \mathbf{u})} = \frac{\mathbf{e}^T \widehat{\mathbf{M}}_a \mathbf{L}_a \widehat{\mathbf{Z}} \mathbf{u}}{(K \phi_a)}, \quad (\text{A-18})$$

where the last equality uses (8) in the main article. The average squared birth phenotype  
 708 for parents aged  $a$  is

$$\mathcal{E}(X_0^a)^2 = \frac{\mathbf{e}^T \widehat{\mathbf{M}}_a \mathbf{L}_a \widehat{\mathbf{Z}} \widehat{\mathbf{Z}} \mathbf{u}}{(\mathbf{e}^T \widehat{\mathbf{M}}_a \mathbf{L}_a \mathbf{u})} = \frac{\mathbf{e}^T \widehat{\mathbf{M}}_a \mathbf{L}_a \widehat{\mathbf{Z}} \widehat{\mathbf{Z}} \mathbf{u}}{(K \phi_a)}. \quad (\text{A-19})$$

The variance of birth phenotype for parents of age  $a$  is

$$V_0^a = \text{Var}(X_0^a) = \mathcal{E}[X_0^a]^2 - [\mathcal{E}(X_0^a)]^2. \quad (\text{A-20})$$

Now the average birth phenotype for all parents (i.e. of all ages) is

$$\mathcal{E}(X_0) = \sum_a \phi_a \mathcal{E}(X_0^a) = \frac{1}{K} \sum_a \mathbf{e}^T \widehat{\mathbf{M}}_a \mathbf{L}_a \widehat{\mathbf{Z}} \mathbf{u}. \quad (\text{A-21})$$

711 Finally, the variance of birth phenotype for all parents is

$$\text{Var}(X_0) = \left\{ \sum_a \phi_a [\mathcal{E}(X_0^a)]^2 - [\mathcal{E}(X_0)]^2 \right\} + \left\{ \sum_a \phi_a V_0^a \right\} \quad (\text{A-22})$$

$$= \sum_a \{ \phi_a \mathcal{E} [X_0^a]^2 - [\mathcal{E}(X_0)]^2 \} \quad (\text{A-23})$$

$$= \frac{1}{K} \sum_a \left\{ \mathbf{e}^T \widehat{\mathbf{M}}_a \mathbf{L}_a \widehat{\mathbf{Z}} \widehat{\mathbf{Z}} \mathbf{u} - \frac{1}{K} (\mathbf{e}^T \widehat{\mathbf{M}}_a \mathbf{L}_a \widehat{\mathbf{Z}} \mathbf{u})^2 \right\}. \quad (12)$$

### A3 Perturbation of $\mathbf{u}$

For the unperturbed matrix  $\mathbf{A}(r)$  we have defined the right eigenvector  $\mathbf{u}$  as in (4) in the  
 714 main article but also need the left eigenvector  $\mathbf{v}$ ,

$$\mathbf{v}^T \mathbf{A}(r) = \mathbf{v}^T. \quad (\text{A-24})$$

For convenience we normalize so that  $(\mathbf{v}^T \mathbf{u}) = 1$ . Then define the projection matrix

$$\mathcal{Z} = \mathbf{u} \mathbf{v}^T, \quad (\text{A-25})$$

and the matrix

$$\mathcal{Q} = \mathbf{A}(r) - \mathcal{Z}. \quad (\text{A-26})$$

717 Now suppose that we change parameters with a small  $0 < \epsilon \ll 1$  so that

$$\mathbf{F}_a \mathbf{L}_a \rightarrow \mathbf{F}_a \mathbf{L}_a + \epsilon \mathbf{\Delta}_a. \quad (\text{A-27})$$

Then we have the resulting changes

$$\begin{aligned}
 r &\rightarrow r + \epsilon r_1, \\
 \mathbf{A}(r) &\rightarrow \mathbf{A}(r) + \epsilon \Delta_{\mathbf{A}}, \\
 \mathbf{u} &\rightarrow \mathbf{u} + \epsilon \delta_u.
 \end{aligned}
 \tag{A-28}$$

Note that the change  $\delta_u$  must be orthogonal to  $\mathbf{u}$ , so that  $\mathcal{Z}\delta_u = 0$ . From (4) in the main  
720 article  $\Delta_{\mathbf{A}}$  and  $\delta_u$  are given by

$$\Delta_{\mathbf{A}} = \sum_a e^{-ra} \Delta_a - r_1 \sum_a e^{-ra} a \mathbf{F}_a \mathbf{L}_a = \mathcal{D}_1 - r_1 \mathcal{D}_2.
 \tag{A-29}$$

Clearly

$$\delta_u = \mathbf{A}(r) \delta_u + \Delta_{\mathbf{A}} \mathbf{u}.
 \tag{A-30}$$

A standard argument (we multiply above on left by  $\mathbf{v}^T$ ) yields the change

$$r_1 = \frac{\mathbf{v}^T \mathcal{D}_1 \mathbf{u}}{\mathbf{v}^T \mathcal{D}_2 \mathbf{u}}.
 \tag{A-31}$$

723 Next we observe that

$$\mathcal{Z} \mathbf{A}(r) = \mathbf{A}(r) \mathcal{Z}; \quad \mathcal{Q} \mathbf{A}(r) = \mathbf{A}(r) \mathcal{Q}.
 \tag{A-32}$$

Recall that  $\mathcal{Z}\delta_u = 0$  so  $\delta_u = (\mathbf{I} - \mathcal{Z}) \delta_u$ . This is why we multiply (A-30) on the left by  
 $(\mathbf{I} - \mathcal{Z})$  to find

$$(\mathbf{I} - \mathcal{Z}) \mathbf{A}(r) \delta_u + (\mathbf{I} - \mathcal{Z}) \Delta_{\mathbf{A}} \mathbf{u} = (\mathbf{I} - \mathcal{Z}) \delta_u = \delta_u.
 \tag{A-33}$$

726 Next,

$$(\mathbf{I} - \mathcal{Z}) \mathbf{A}(r) = \mathbf{A}(r) - \mathcal{Z} \mathbf{A}(r) = (\mathbf{A}(r) - \mathcal{Z}), \quad (\text{A-34})$$

where we use (A-25). Hence (A-31) becomes

$$(\mathbf{I} - \mathcal{Z}) \Delta_{\mathbf{A}} \mathbf{u} = \delta_u - (\mathbf{A}(r) - \mathcal{Z}) \delta_u = [\mathbf{I} - (\mathbf{A} - \mathcal{Z})] \delta_u.$$

We now multiply across by  $[\mathbf{I} - (\mathbf{A} - \mathcal{Z})]^{-1}$  on both sides to obtain

$$\delta_u = [\mathbf{I} - (\mathbf{A} - \mathcal{Z})]^{-1} (\mathbf{I} - \mathcal{Z}) \Delta_{\mathbf{A}} \mathbf{u}. \quad (\text{A-35})$$

#### A4 Perturbation matrices

729 The perturbations in (A-27) come from changes in the fertility or survival matrices, as we explain in this subsection.

**Selection on modifiers of fertility** A small change in fertility results from a change

732 in total recruitment and/or in the phenotype distribution of offspring: thus at a given age  $a$ , there is a change in the fertility matrix  $\mathbf{F}_a$  to  $(\mathbf{F}_a + \epsilon \Delta_{\mathbf{F}_a})$ , with

$$\Delta_{\mathbf{F}_a} = \mathbf{D}_a \Delta_{\widehat{\mathbf{M}}} + \Delta_{\mathbf{D}} \widehat{\mathbf{M}}_a. \quad (\text{A-36})$$

**Selection on modifiers of phenotype transition rates** Phenotype transition rates

735  $\mathbf{P}_a$  are made up of age-phenotype specific survival rates ( $S_a(x)$ ) and probabilities of growth from phenotype  $x'$  to  $x$  ( $G_a(x|x')$ ). A small change in one or more of these rates at age  $a$  means that we change  $\mathbf{P}_a$  to  $\mathbf{P}_a \rightarrow \mathbf{P}_a + \epsilon \Delta_{\mathbf{P}_a}$  with

$$\Delta_{\mathbf{P}_a} = \mathbf{G}_a \Delta_{\mathbf{S}} + \Delta_{\mathbf{G}} \mathbf{S}_a. \quad (\text{A-37})$$

738 But notice that this change at age  $a$  in  $\mathbf{P}_a$  will also change every survivorship  $\mathbf{L}_b$  at ages  $b > a$ . The change in survivorship is and

$$\Delta \mathbf{L}_b = \begin{cases} 0 & \text{for ages } b \leq a, \\ \mathbf{L}_{b|(a+1)} \Delta \mathbf{P}_a \mathbf{L}_a & \text{for ages } b \geq (a+1). \end{cases} \quad (\text{A-38})$$

## A5 Perturbation of parental variance

741 A small change in the phenotype-demography matrices as described in (A-27) results in a change in in the covariance between offspring birth phenotype and parent birth phenotype. Similarly, the change in the parent birth phenotype variance is

$$\Delta \text{Var}(X_0) = \Delta \left( \sum_a \phi_a \mathcal{E} [X_0^a]^2 \right) - 2\Delta(\mathcal{E}[X_0]) \mathcal{E}(X_0), \quad (\text{A-39})$$

744 which gives with (A-19),

$$\begin{aligned} \Delta \left( \sum_a \phi_a \mathcal{E} [X_0^a]^2 \right) &= \mathbf{e}^T \sum_a \left\{ \frac{\Delta \widehat{\mathbf{M}}_a \mathbf{L}_a K - \Delta_K \widehat{\mathbf{M}}_a \mathbf{L}_a}{K^2} \widehat{\mathbf{Z}} \widehat{\mathbf{Z}} \mathbf{u} \right\} \\ &\quad + \frac{1}{K} \sum_a (\mathbf{e}^T \widehat{\mathbf{M}}_a \mathbf{L}_a \widehat{\mathbf{Z}} \widehat{\mathbf{Z}} \delta_u), \end{aligned} \quad (\text{A-40})$$

and

$$\Delta(\mathcal{E}(X_0)) = \frac{\mathbf{e}^T}{K} \sum_a \left\{ \frac{\Delta \widehat{\mathbf{M}}_a \mathbf{L}_a K - \Delta_K \widehat{\mathbf{M}}_a \mathbf{L}_a}{K} \widehat{\mathbf{Z}} \mathbf{u} + \widehat{\mathbf{M}}_a \mathbf{L}_a \widehat{\mathbf{Z}} \delta_u \right\}, \quad (\text{A-41})$$

the equation (17) of the main article.

## 747 A6 Closure of terms

A general result we will use is: given a matrix  $\mathcal{Q}$  and a real variable  $w$ ,

$$\begin{aligned} \text{define } \mathcal{H} &= [\mathbf{I} - z \mathcal{Q}]^{-1}, \\ \text{then } \frac{d\mathcal{H}}{dz} &= \mathcal{H} \mathcal{Q} \mathcal{H}. \end{aligned} \quad (\text{A-42})$$

For our calculations in terms of the phenotype-demography matrices, suppose there is an  
750 age  $m$  after which fertility  $\mathbf{F}_a = \mathbf{F}_m$  and survival  $\mathbf{P}_a = \mathbf{P}_m$ . Each sum in (A-29) can be written in two parts,

$$\mathcal{D}_1 = \sum_{a=1}^{a=(m-1)} e^{-ra} \Delta_a + \sum_{a \geq m} e^{-ra} \Delta_a = \mathcal{D}_{11} + \mathcal{D}_{12}, \quad (\text{A-43})$$

$$\mathcal{D}_2 = \sum_{a=1}^{a=(m-1)} e^{-ra} a \mathbf{F}_a \mathbf{L}_a + \sum_{a \geq m} e^{-ra} a \mathbf{F}_a \mathbf{L}_a = \mathcal{D}_{21} + \mathcal{D}_{22}. \quad (\text{A-44})$$

We have to do the sums to age  $(m-1)$  as written. We seek explicit expressions for the  
753 sums that start at  $m$ . In the latter we have constant fertility and survival so

$$\mathbf{F}_{m+k} = \mathbf{F}_m, \text{ and } \mathbf{L}_{m+k} = \mathbf{P}_m^k \mathbf{L}_m, k \geq 0. \quad (\text{A-45})$$

## A7 Explicit form of $\mathcal{D}_{22}$

First we do the easier term  $\mathcal{D}_{22}$ , shown in (A-44). For a real variable  $w$ , define the matrix

756 sum

$$\mathcal{A}(w) = \sum_{a \geq m} w^a \mathbf{F}_a \mathbf{L}_a, \quad (\text{A-46})$$

$$= \mathbf{F}_m w^m \left[ \sum_{k \geq 0} w^k \mathbf{P}_m^k \right] \mathbf{L}_m, \quad (\text{A-47})$$

$$= \mathbf{F}_m w^m [\mathbf{I} - w \mathbf{P}_m]^{-1} \mathbf{L}_m, \quad (\text{A-48})$$

We can write  $\mathcal{A}(w)$  in a computable closed form in two steps:

$$\mathcal{H}_m(w) = [\mathbf{I} - w\mathbf{P}_m]^{-1}, \text{ (Step 1)} \quad (\text{A-49})$$

$$\mathcal{A}(w) = w^m \mathbf{F}_m \mathcal{H}_m(w) \mathbf{L}_m. \text{ (Step 2)} \quad (\text{A-50})$$

Next we use (A-46) to see that

$$w \frac{d\mathcal{A}(w)}{dw} = \sum_{a \geq m} a w^a \mathbf{F}_a \mathbf{L}_a. \quad (\text{A-51})$$

759 From (A-42) and (A-49) we find that

$$\frac{w d\mathcal{A}(w)}{dw} = m \mathcal{A}(w) + w^{m+1} \mathbf{F}_m \mathcal{H}_m(w) \mathbf{P}_m \mathcal{H}_m(w) \mathbf{L}_m. \quad (\text{A-52})$$

Hence the final expression: we use (A-49) and (A-50), and set  $w = e^{-r}$ , to get

$$\begin{aligned} \mathcal{D}_{22} &= \sum_{a \geq m} e^{-ra} a \mathbf{F}_a \mathbf{L}_a \\ &= m \mathcal{A}(e^{-r}) + e^{-(m+1)r} \mathbf{F}_m \mathcal{H}_m(e^{-r}) \mathbf{P}_m \mathcal{H}_m(e^{-r}) \mathbf{L}_m. \end{aligned} \quad (\text{A-53})$$

## A8 Explicit form of $\mathcal{D}_{12}$

762 Second we turn to the more involved term  $\mathcal{D}_{12}$  in (A-43) which is

$$\mathcal{D}_{12} = \sum_{a \geq m} e^{-ra} \Delta_a = e^{-rm} \sum_{k \geq 0} e^{-rk} \Delta_{m+k}. \quad (\text{A-54})$$

To sort this out we need to get explicit about perturbations to fertility and survival. In general we must consider the following perturbations:

765 fertility  $\mathbf{F}_m$  at ages  $\geq m$  changes to  $(\mathbf{F}_m + \epsilon \Delta_F)$ ;

survival  $\mathbf{P}_m$  at ages  $\geq m$  changes to  $(\mathbf{P}_m + \epsilon \Delta_P)$ ;

and cumulative survival  $\mathbf{L}_m$  up to age  $m$  changes to  $(\mathbf{L}_m + \epsilon \mathbf{\Delta}_L)$ . It is important

768

to recognise that the change  $\mathbf{\Delta}_L$  depends only on changes at ages  $< m$ .

Step 1: we need the change in  $\mathbf{P}_m^k$ . This is just the coefficient of  $y$  in  $(\mathbf{P}_m + y \mathbf{\Delta}_P)^k$

where  $y$  is just a real variable. For the present, we write this coefficient as  $\mathbf{\Delta}_{P_k}$ . Step 2:

771

we recall (A-45): for  $k \geq 0$  we have  $\mathbf{F}_{m+k} \mathbf{L}_{m+k} = \mathbf{F}_m \mathbf{P}_m^k \mathbf{L}_m$  and therefore the linear change in this product is

$$\mathbf{\Delta}_{m+k} = \mathbf{\Delta}_F \mathbf{P}_m^k \mathbf{L}_m + \mathbf{F}_m \mathbf{P}_m^k \mathbf{\Delta}_L + \mathbf{F}_m \mathbf{\Delta}_{P_k} \mathbf{L}_m. \quad (\text{A-55})$$

Step 3: we use (A-55) to rewrite the sum in (A-54) as

$$\begin{aligned} \mathcal{D}_{12} &= e^{-rm} \sum_{k \geq 0} e^{-rk} \mathbf{\Delta}_{m+k}, \\ &= e^{-rm} \mathbf{\Delta}_F \left[ \sum_{k \geq 0} e^{-rk} \mathbf{P}_m^k \right] \mathbf{L}_m \\ &\quad + e^{-rm} \mathbf{F}_m \left[ \sum_{k \geq 0} e^{-rk} \mathbf{P}_m^k \right] \mathbf{\Delta}_L \\ &\quad + e^{-rm} \mathbf{F}_m \left[ \sum_{k \geq 0} e^{-rk} \mathbf{\Delta}_{P_k} \right] \mathbf{L}_m \end{aligned} \quad (\text{A-56})$$

774

Step 4: we recall from (A-49) that  $\mathcal{H}_m(w) = [\mathbf{I} - w \mathbf{P}_m]^{-1}$  and rewrite (A-56) as

$$\begin{aligned} \mathcal{D}_{12} &= e^{-rm} \mathbf{\Delta}_F \mathcal{H}_m(e^{-r}) \mathbf{L}_m + e^{-rm} \mathbf{F}_m \mathcal{H}_m(e^{-r}) \mathbf{\Delta}_L \\ &\quad + e^{-rm} \mathbf{F}_m \left[ \sum_{k \geq 0} e^{-rk} \mathbf{\Delta}_{P_k} \right] \mathbf{L}_m \end{aligned} \quad (\text{A-57})$$

Step 5: now we just want a closed form for the sum in the second line of (A-57). Recall

that  $\mathbf{\Delta}_{P_k}$  is just the coefficient of  $y$  in  $(\mathbf{P}_m + y \mathbf{\Delta}_P)^k$ . So we define the function

$$\mathcal{G}(w, y) = \sum_{k \geq 0} e^{-rk} (\mathbf{P}_m + y \mathbf{\Delta}_P)^k = [\mathbf{I} - w (\mathbf{P}_m + y \mathbf{\Delta}_P)]^{-1}. \quad (\text{A-58})$$



777 Then we must have

$$\begin{aligned}
 \sum_{k \geq 0} e^{-rk} \Delta_{P_k} &= \left. \frac{\partial \mathcal{G}}{\partial y} \right|_{y=0}, \\
 &= w \mathcal{G}(w, 0) \Delta_P \mathcal{G}(w, 0) \\
 &= w \mathcal{H}_m(w) \Delta_P \mathcal{H}_m(w).
 \end{aligned} \tag{A-59}$$

Finally, using (A-59) in (A-57) we have

$$\begin{aligned}
 \mathcal{D}_{12} &= e^{-rm} \Delta_F \mathcal{H}_m(e^{-r}) \mathbf{L}_m + e^{-rm} \mathbf{F}_m \mathcal{H}_m(e^{-r}) \Delta_L \\
 &\quad + e^{-r(m+1)} \mathbf{F}_m \mathcal{H}_m(e^{-r}) \Delta_P \mathcal{H}_m(e^{-r}) \mathbf{L}_m.
 \end{aligned} \tag{A-60}$$

For the final expressions, we use (A-43) and (A-44). For the sums up to age  $(m-1)$  we  
 780 use  $\mathcal{D}_{11}, \mathcal{D}_{21}$  as written. Then we use (A-60) to get  $\mathcal{D}_{12}$  and (A-53) to get  $\mathcal{D}_{12}$ .

## A9 Perturbation of transition densities

Growth and parent-offspring transition involve transition densities for a variable  $y$  con-  
 783 ditional on a known variable  $x$ , usually taken to be proportional to a standard normal  $f$   
 with a mean  $\mu(x)$  and variance  $s(x)$ . The values of  $y$  are constrained to an interval  $[A, B]$   
 and we call the constrained transition density  $\hat{f}$ ,

$$f = \frac{1}{\sigma\sqrt{2\pi}} \exp \left[ -\frac{(x - \mu)^2}{2\sigma^2} \right] \tag{A-61}$$

$$\hat{f} = \frac{f}{K}, \quad K = \int_A^B f, \tag{A-62}$$

$$\int_A^B \hat{f} = 1, \quad \int_A^B x \hat{f} = \mu_1, \quad \int_A^B (x - \mu_1)^2 \hat{f} = \sigma_1^2 \tag{A-63}$$

786 The mean  $\mu(x)$  and variance  $s(x)$  depend on parameters that we call  $\theta$ . A change in any parameter  $\theta$  affects  $\hat{f}$  via  $\mu$  or  $s$ , so here we simply consider changes in the latter.

$$\partial_{\theta} \hat{f} = \frac{\delta_{\theta} f}{K} - \hat{f} \frac{\delta_{\theta} K}{K} \quad (\text{A-64})$$

$$\partial_{\mu} f = +\frac{(x-\mu)}{\sigma^2} f, \quad \delta_{\sigma} f = \frac{(x-\mu)^2}{\sigma^3} f - \frac{f}{\sigma} \quad (\text{A-65})$$

$$= \left(\frac{1}{\sigma}\right) \left[ \frac{(x-\mu)^2}{\sigma^2} - 1 \right] f \quad (\text{A-66})$$

$$\partial_{\mu} K = +\left(\frac{K}{\sigma^2}\right) \int (x-\mu) \hat{f} = +K \frac{(\mu_1 - \mu)}{\sigma^2} \quad (\text{A-67})$$

$$\partial_{\sigma} K = K \left(\frac{1}{\sigma}\right) \left[ \int \frac{(x-\mu)^2}{\sigma^2} \hat{f} - 1 \right] = K \left(\frac{1}{\sigma}\right) \left[ \frac{\sigma_1^2 + (\mu_1 - \mu)^2}{\sigma^2} - 1 \right] \quad (\text{A-68})$$

$$\partial_{\mu} \hat{f} = \left[ +\frac{(x-\mu)}{\sigma^2} - \frac{(\mu_1 - \mu)}{\sigma^2} \right] \hat{f} = +\frac{(x - \mu_1)}{\sigma^2} \hat{f} \quad (\text{A-69})$$

$$\partial_{\sigma} \hat{f} = \left(\frac{\hat{f}}{\sigma}\right) [(x-\mu)^2 - (\mu_1 - \mu)^2 - \sigma_1^2] \left(\frac{1}{\sigma^2}\right) \quad (\text{A-70})$$

$$= \left(\frac{\hat{f}}{\sigma}\right) \left(\frac{1}{\sigma^2}\right) [(x - \mu_1)^2 - 2(x - \mu_1)(\mu_1 - \mu) - \sigma_1^2] \quad (\text{A-71})$$

$$= \left(\frac{1}{\sigma}\right) \left[ \frac{(x - \mu_1)^2 - \sigma_1^2}{\sigma^2} + 2\frac{(x - \mu_1)(\mu_1 - \mu)}{\sigma^2} \right] \quad (\text{A-72})$$

The final equations may be used to construct the perturbation matrices in (A-27)/(13).

## 789 **Appendix: Supplemental tables**

Table S1: Change in key population parameters (%): expected and variance values of the stable cohort phenotype distribution ( $X_{c_0}$ ), the stable parent (at own) birth phenotype distribution ( $X_0$ ) and offspring birth phenotype distribution ( $Y_0$ ) when selected model parameters are perturbed (Soay sheep). Note that shown values were calculated numerically by adding 0.01 to model parameters.

|           | $\mathcal{E}(X_{c_0})$ | $\text{Var}(X_{c_0})$ | $\mathcal{E}(X_0)$ | $\text{Var}(X_0)$ | $\mathcal{E}(Y_0)$ | $\text{Var}(Y_0)$ | $\text{Cov}(Y_0-X_0)$ | $h^2$ |
|-----------|------------------------|-----------------------|--------------------|-------------------|--------------------|-------------------|-----------------------|-------|
| SurvIntL* | 0.00                   | -0.03                 | -0.02              | 0.00              | 0.01               | -0.11             | -0.46                 | -0.46 |
| SurvIntY  | 0.00                   | -0.01                 | -0.01              | 0.01              | 0.00               | -0.03             | -0.13                 | -0.14 |
| SurvIntA  | 0.00                   | -0.01                 | 0.00               | 0.00              | 0.01               | -0.05             | -0.21                 | -0.20 |
| SurvIntS  | 0.00                   | -0.01                 | 0.00               | -0.01             | 0.00               | -0.03             | -0.11                 | -0.10 |
| SurvSlpL  | 0.00                   | -0.30                 | -0.15              | -0.71             | 0.15               | -1.24             | -4.38                 | -3.69 |
| SurvSlpY  | 0.01                   | -0.09                 | -0.07              | 0.05              | 0.05               | -0.38             | -1.73                 | -1.79 |
| SurvSlpA  | 0.04                   | -0.14                 | -0.01              | -0.11             | 0.15               | -0.94             | -3.75                 | -3.65 |
| SurvSlpS  | -0.02                  | -0.27                 | -0.03              | -0.32             | 0.04               | -0.83             | -2.67                 | -2.36 |
| TwIntL    | 0.00                   | 0.00                  | 0.00               | 0.00              | 0.00               | 0.00              | 0.00                  | 0.00  |
| TwIntY    | 0.00                   | 0.00                  | 0.00               | 0.00              | 0.00               | 0.00              | 0.00                  | 0.00  |
| TwIntA    | 0.00                   | 0.00                  | 0.00               | 0.00              | 0.00               | 0.00              | 0.00                  | 0.00  |
| TwIntS    | 0.00                   | 0.00                  | 0.00               | 0.00              | 0.00               | 0.00              | 0.00                  | 0.00  |
| TwSlpL    | 0.00                   | 0.00                  | 0.00               | 0.00              | 0.00               | 0.00              | 0.00                  | 0.00  |
| TwSlpY    | 0.00                   | 0.00                  | 0.00               | 0.00              | 0.00               | 0.00              | 0.00                  | 0.00  |
| TwSlpA    | 0.00                   | 0.00                  | 0.00               | 0.00              | 0.00               | -0.01             | -0.01                 | -0.01 |
| TwSlpS    | 0.00                   | -0.01                 | 0.00               | -0.01             | 0.00               | -0.04             | -0.13                 | -0.11 |
| PrIntL    | -0.03                  | 0.24                  | -0.01              | 0.11              | -0.03              | 0.22              | 0.66                  | 0.54  |
| PrIntY    | 0.00                   | -0.01                 | 0.00               | 0.00              | 0.00               | -0.02             | 0.04                  | 0.04  |
| PrIntA    | 0.01                   | -0.01                 | 0.00               | 0.00              | 0.02               | -0.08             | -0.22                 | -0.22 |
| PrIntS    | 0.00                   | -0.02                 | 0.00               | -0.02             | 0.00               | -0.05             | -0.15                 | -0.13 |
| PrSlpL    | -0.41                  | 2.84                  | -0.13              | 1.37              | -0.35              | 2.59              | 4.53                  | 3.12  |
| PrSlpY    | -0.08                  | -0.20                 | -0.04              | -0.10             | -0.04              | -0.34             | 0.53                  | 0.62  |
| PrSlpA    | 0.15                   | -0.03                 | 0.14               | 0.11              | 0.40               | -1.58             | -4.11                 | -4.21 |
| PrSlpS    | -0.04                  | -0.41                 | -0.05              | -0.46             | 0.04               | -1.13             | -3.76                 | -3.31 |
| GrMIntL   | 0.01                   | 0.01                  | 0.00               | 0.02              | 0.01               | 0.00              | -0.01                 | -0.03 |
| GrMIntY   | 0.01                   | 0.02                  | 0.01               | 0.03              | 0.01               | 0.02              | -0.01                 | -0.03 |
| GrMIntA   | 0.01                   | 0.07                  | 0.02               | 0.09              | 0.02               | 0.04              | -0.06                 | -0.15 |
| GrMIntS   | 0.00                   | -0.01                 | 0.00               | -0.01             | 0.00               | -0.02             | -0.08                 | -0.07 |
| GrMSlpL   | 0.07                   | 0.19                  | 0.08               | 0.17              | 0.09               | 0.02              | 0.67                  | 0.49  |
| GrMSlpY   | 0.10                   | 0.43                  | 0.12               | 0.45              | 0.11               | 0.30              | 0.40                  | -0.05 |
| GrMSlpA   | 0.30                   | 1.55                  | 0.39               | 2.01              | 0.38               | 0.90              | -0.71                 | -2.67 |
| GrMSlpS   | -0.04                  | -0.15                 | -0.03              | -0.14             | -0.01              | -0.57             | -2.09                 | -1.95 |

Table S1: continued.

|         | $\mathcal{E}(X_{c_0})$ | $\text{Var}(X_{c_0})$ | $\mathcal{E}(X_0)$ | $\text{Var}(X_0)$ | $\mathcal{E}(Y_0)$ | $\text{Var}(Y_0)$ | $\text{Cov}(Y_0, X_0)$ | $h^2$ |
|---------|------------------------|-----------------------|--------------------|-------------------|--------------------|-------------------|------------------------|-------|
| GrVIntL | 0.00                   | 0.00                  | 0.00               | 0.00              | 0.00               | 0.00              | 0.00                   | 0.00  |
| GrVIntY | 0.00                   | 0.00                  | 0.00               | 0.00              | 0.00               | 0.00              | 0.00                   | 0.00  |
| GrVIntA | 0.00                   | 0.00                  | 0.00               | 0.01              | 0.00               | 0.00              | 0.01                   | 0.00  |
| GrVIntS | 0.00                   | 0.00                  | 0.00               | 0.00              | 0.00               | 0.00              | 0.00                   | 0.00  |
| GrVSlpL | 0.01                   | 0.03                  | 0.01               | 0.04              | 0.01               | 0.03              | 0.11                   | 0.07  |
| GrVSlpY | 0.00                   | 0.03                  | 0.00               | 0.05              | 0.00               | 0.02              | 0.05                   | -0.01 |
| GrVSlpA | 0.00                   | 0.09                  | 0.01               | 0.21              | 0.00               | 0.08              | 0.12                   | -0.09 |
| GrVSlpS | 0.00                   | 0.00                  | 0.00               | 0.00              | 0.00               | -0.01             | -0.07                  | -0.07 |
| InMIntL | 0.01                   | -0.11                 | 0.00               | -0.02             | 0.01               | -0.10             | -0.06                  | -0.04 |
| InMIntY | 0.01                   | -0.01                 | 0.00               | -0.02             | 0.01               | -0.01             | 0.05                   | 0.07  |
| InMIntA | 0.06                   | 0.10                  | 0.05               | 0.07              | 0.06               | 0.07              | -0.04                  | -0.12 |
| InMIntS | 0.01                   | 0.01                  | 0.01               | -0.01             | 0.02               | 0.00              | 0.00                   | 0.01  |
| InMSlpL | 0.09                   | -1.35                 | 0.00               | -0.30             | 0.08               | -1.25             | 0.02                   | 0.33  |
| InMSlpY | 0.13                   | -0.10                 | 0.09               | -0.29             | 0.12               | -0.17             | 1.45                   | 1.75  |
| InMSlpA | 1.30                   | 2.55                  | 1.25               | 2.13              | 1.35               | 1.87              | 1.52                   | -0.60 |
| InMSlpS | 0.30                   | 0.28                  | 0.26               | -0.13             | 0.38               | 0.16              | 0.19                   | 0.32  |
| InV1L   | 0.00                   | 0.01                  | 0.00               | 0.00              | 0.00               | 0.01              | -0.01                  | 0.00  |
| InVIntY | 0.00                   | 0.01                  | 0.00               | 0.01              | 0.00               | 0.01              | 0.01                   | 0.00  |
| InVIntA | 0.00                   | 0.10                  | 0.01               | 0.13              | 0.00               | 0.10              | 0.12                   | -0.01 |
| InVIntS | 0.00                   | 0.02                  | 0.00               | 0.02              | 0.00               | 0.03              | 0.02                   | 0.00  |
| InVSlpL | 0.00                   | 0.15                  | 0.00               | -0.05             | 0.00               | 0.13              | -0.06                  | -0.01 |
| InVSlpY | 0.00                   | 0.22                  | 0.02               | 0.17              | 0.00               | 0.20              | 0.18                   | 0.01  |
| InVSlpA | 0.01                   | 2.13                  | 0.20               | 2.86              | 0.02               | 2.17              | 2.68                   | -0.18 |
| InVSlpS | 0.00                   | 0.50                  | 0.05               | 0.55              | 0.00               | 0.62              | 0.53                   | -0.02 |

\*Model parameters were perturbed upwards by adding 0.01. Quantities were calculated numerically. Model parameter names are written in CamelCase forming compounds of the following abbreviations in order of appearance: survival (Surv), intercept (int), lambs (L), yearlings (Y), prime-aged adults (A), senescents (S), slope (slp), twinning rate (Tw), probability of reproduction (Pr), growth (Gr), mean (M), variance (V), inheritance (In).

Table S2: Change in key population parameters (%): expected and variance values of the stable cohort phenotype distribution ( $X_{c_0}$ ), the stable parent (at own) birth phenotype distribution ( $X_0$ ) and offspring birth phenotype distribution ( $Y_0$ ) when selected model parameters are perturbed (roe deer). Note that shown values were calculated numerically by adding 0.01 to model parameters.

|           | $\mathcal{E}(X_0)$ | $\text{Var}(X_0)$ | $\mathcal{E}(X_0^P)$ | $\text{Var}(X_0^P)$ | $\mathcal{E}(Y)$ | $\text{Var}(Y)$ | $\text{Cov}(Y X_0^P)$ | $h^2$ |
|-----------|--------------------|-------------------|----------------------|---------------------|------------------|-----------------|-----------------------|-------|
| SurvIntY* | -0.01              | 0.00              | -0.02                | 0.01                | 0.00             | 0.01            | 0.02                  | 0.00  |
| SurvIntA  | 0.00               | -0.01             | 0.00                 | 0.00                | 0.02             | 0.00            | -0.30                 | -0.30 |
| SurvIntS  | 0.00               | 0.01              | 0.00                 | 0.01                | 0.01             | 0.01            | -0.05                 | -0.06 |
| SurvSlpY  | -0.11              | 0.00              | -0.17                | -0.12               | -0.03            | 0.07            | -0.09                 | 0.02  |
| SurvSlpA  | 0.13               | -0.13             | 0.02                 | -0.16               | 0.36             | -0.10           | -6.02                 | -5.87 |
| SurvSlpS  | 0.07               | 0.20              | 0.08                 | 0.21                | 0.16             | 0.31            | -1.32                 | -1.52 |
| TwIntY    | 0.00               | 0.00              | 0.00                 | 0.00                | 0.00             | 0.00            | 0.00                  | 0.00  |
| TwIntA    | -0.01              | -0.01             | -0.01                | -0.01               | 0.00             | 0.00            | 0.01                  | 0.02  |
| TwIntS    | 0.00               | 0.00              | 0.00                 | 0.00                | 0.00             | 0.01            | -0.01                 | -0.02 |
| TwSlpY    | 0.00               | 0.00              | 0.00                 | 0.00                | 0.00             | 0.00            | 0.00                  | 0.00  |
| TwSlpA    | -0.12              | -0.20             | -0.12                | -0.24               | -0.06            | -0.15           | -0.12                 | 0.12  |
| TwSlpS    | 0.04               | 0.12              | 0.04                 | 0.12                | 0.06             | 0.15            | -0.33                 | -0.45 |
| PrIntY    | 0.00               | 0.00              | 0.00                 | 0.00                | 0.00             | 0.00            | 0.00                  | 0.00  |
| PrIntA    | -0.02              | 0.00              | -0.02                | 0.00                | -0.01            | 0.01            | 0.08                  | 0.08  |
| PrIntS    | 0.00               | 0.00              | 0.00                 | 0.00                | 0.00             | 0.01            | -0.02                 | -0.03 |
| PrSlpY    | 0.00               | 0.00              | 0.00                 | 0.00                | 0.00             | 0.00            | 0.00                  | 0.00  |
| PrSlpA    | -0.27              | -0.14             | -0.29                | -0.15               | -0.16            | -0.03           | 0.86                  | 1.01  |
| PrSlpS    | 0.04               | 0.12              | 0.05                 | 0.12                | 0.08             | 0.14            | -0.54                 | -0.66 |
| GrMIntY   | 0.02               | -0.05             | 0.02                 | -0.05               | 0.02             | -0.05           | -0.07                 | -0.02 |
| GrMIntA   | 0.05               | 0.09              | 0.05                 | 0.09                | 0.06             | 0.09            | -0.01                 | -0.10 |
| GrMIntS   | 0.00               | 0.02              | 0.00                 | 0.02                | 0.00             | 0.03            | 0.01                  | -0.01 |
| GrMSlpY   | 0.32               | -0.68             | 0.28                 | -0.69               | 0.30             | -0.72           | 0.50                  | 1.21  |
| GrMSlpA   | 1.25               | 2.83              | 1.26                 | 2.72                | 1.52             | 2.81            | 2.33                  | -0.38 |
| GrMSlpS   | 0.07               | 0.44              | 0.08                 | 0.50                | 0.13             | 0.80            | 0.31                  | -0.19 |
| GrVIntY   | 0.00               | 0.02              | 0.00                 | 0.01                | 0.00             | 0.01            | 0.01                  | 0.00  |
| GrVIntA   | 0.00               | 0.05              | 0.00                 | 0.05                | 0.00             | 0.05            | 0.05                  | -0.01 |
| GrVIntS   | 0.00               | 0.00              | 0.00                 | 0.00                | 0.00             | 0.01            | 0.00                  | 0.00  |
| GrVSlpY   | 0.02               | 0.25              | 0.03                 | 0.21                | 0.02             | 0.19            | 0.23                  | 0.02  |
| GrVSlpA   | 0.08               | 1.17              | 0.11                 | 1.26                | 0.09             | 1.28            | 1.24                  | -0.02 |
| GrVSlpS   | 0.00               | 0.08              | 0.01                 | 0.10                | 0.01             | 0.15            | 0.09                  | 0.00  |
| InMIntY   | 0.00               | 0.00              | 0.00                 | 0.00                | 0.00             | 0.00            | 0.00                  | 0.00  |
| InMIntA   | 0.07               | -0.08             | 0.06                 | -0.08               | 0.07             | -0.10           | -0.10                 | -0.02 |
| InMIntS   | 0.01               | 0.05              | 0.01                 | 0.05                | 0.01             | 0.07            | 0.06                  | 0.01  |
| InMSlpY   | 0.00               | 0.00              | 0.00                 | 0.00                | 0.00             | 0.00            | 0.00                  | 0.00  |
| InMSlpA   | 1.64               | -0.71             | 1.51                 | -0.84               | 1.54             | -1.33           | 0.70                  | 1.56  |
| InMSlpS   | 0.16               | 1.28              | 0.19                 | 1.50                | 0.25             | 1.95            | 1.67                  | 0.17  |

Table S2: continued.

|         | $\mathcal{E}(X_0)$ | $\text{Var}(X_0)$ | $\mathcal{E}(X_0^P)$ | $\text{Var}(X_0^P)$ | $\mathcal{E}(Y)$ | $\text{Var}(Y)$ | $\text{Cov}(YX_0^P)$ | $h^2$ |
|---------|--------------------|-------------------|----------------------|---------------------|------------------|-----------------|----------------------|-------|
| InVIntY | 0.00               | 0.00              | 0.00                 | 0.00                | 0.00             | 0.00            | 0.00                 | 0.00  |
| InVIntA | 0.00               | 0.16              | 0.01                 | 0.15                | 0.00             | 0.15            | 0.15                 | 0.00  |
| InVIntS | 0.00               | 0.01              | 0.00                 | 0.02                | 0.00             | 0.02            | 0.02                 | 0.00  |
| InVSlpY | 0.00               | 0.00              | 0.00                 | 0.00                | 0.00             | 0.00            | 0.00                 | 0.00  |
| InVSlpA | 0.03               | 3.79              | 0.14                 | 3.63                | 0.02             | 3.52            | 3.62                 | -0.01 |
| InVSlpS | 0.00               | 0.35              | 0.01                 | 0.50                | 0.00             | 0.59            | 0.49                 | -0.01 |

\*Model parameters were perturbed upwards by adding 0.01. Quantities were calculated numerically. Model parameter names are written in CamelCase forming compounds of the following abbreviations in order of appearance: survival (Surv), intercept (Int), yearlings (Y), prime-aged adults (A), senescents (S), slope (slp), twinning rate (Tw), probability of reproduction (Pr), growth (Gr), mean (M), variance (V), inheritance (In).

## Appendix: Supplemental figures

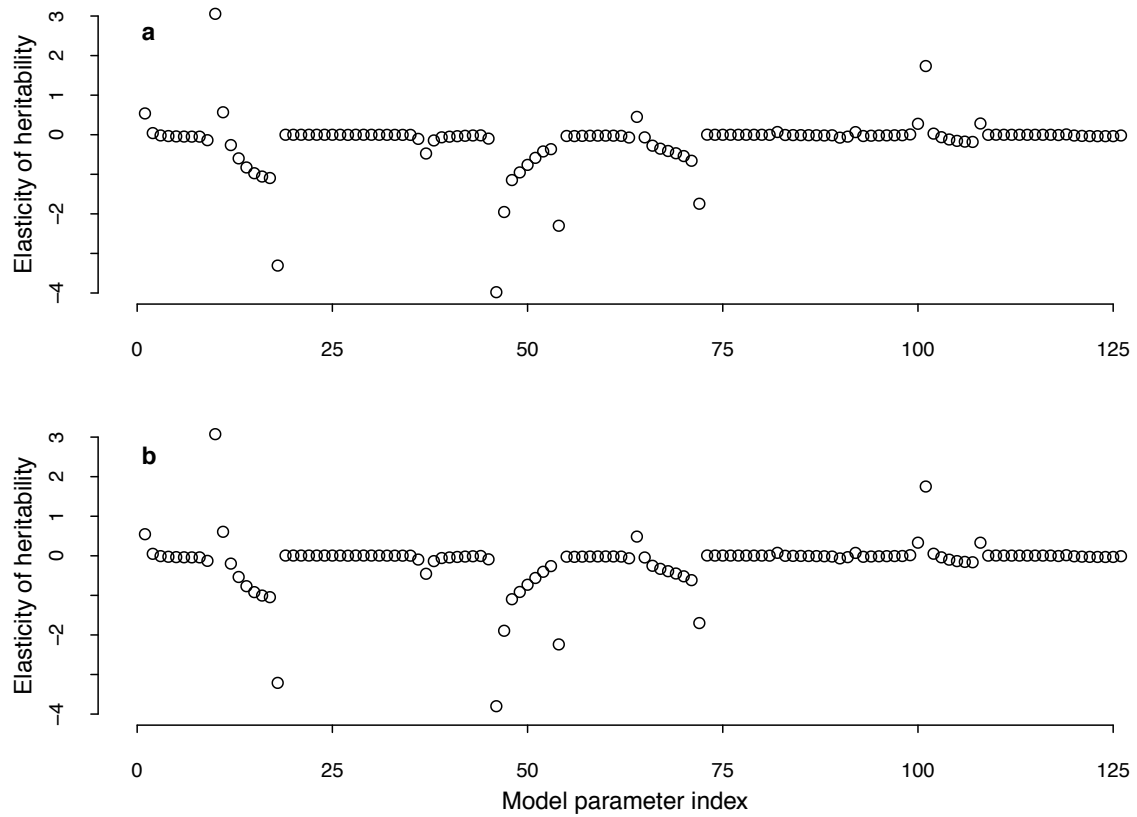

Figure S1: The analytically (a) and numerically (b) computed elasticities of heritability with respect to changes in the model parameters of the Soay sheep IPM. The two ways of computation give very similar results. Note that the values are not summed up within age classes.



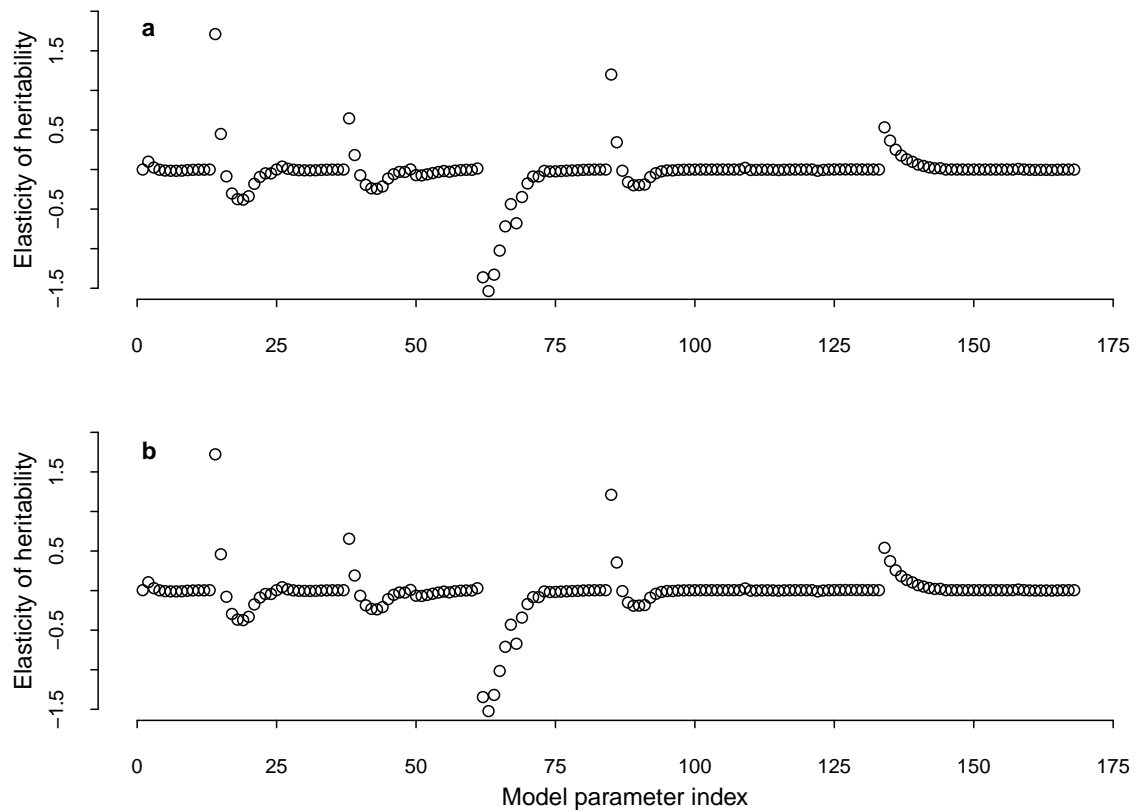

Figure S2: The analytically (a) and numerically (b) computed elasticities of heritability with respect to changes in the model parameters of the roe deer IPM. As for Soay sheep, the two ways of computation give very similar results.

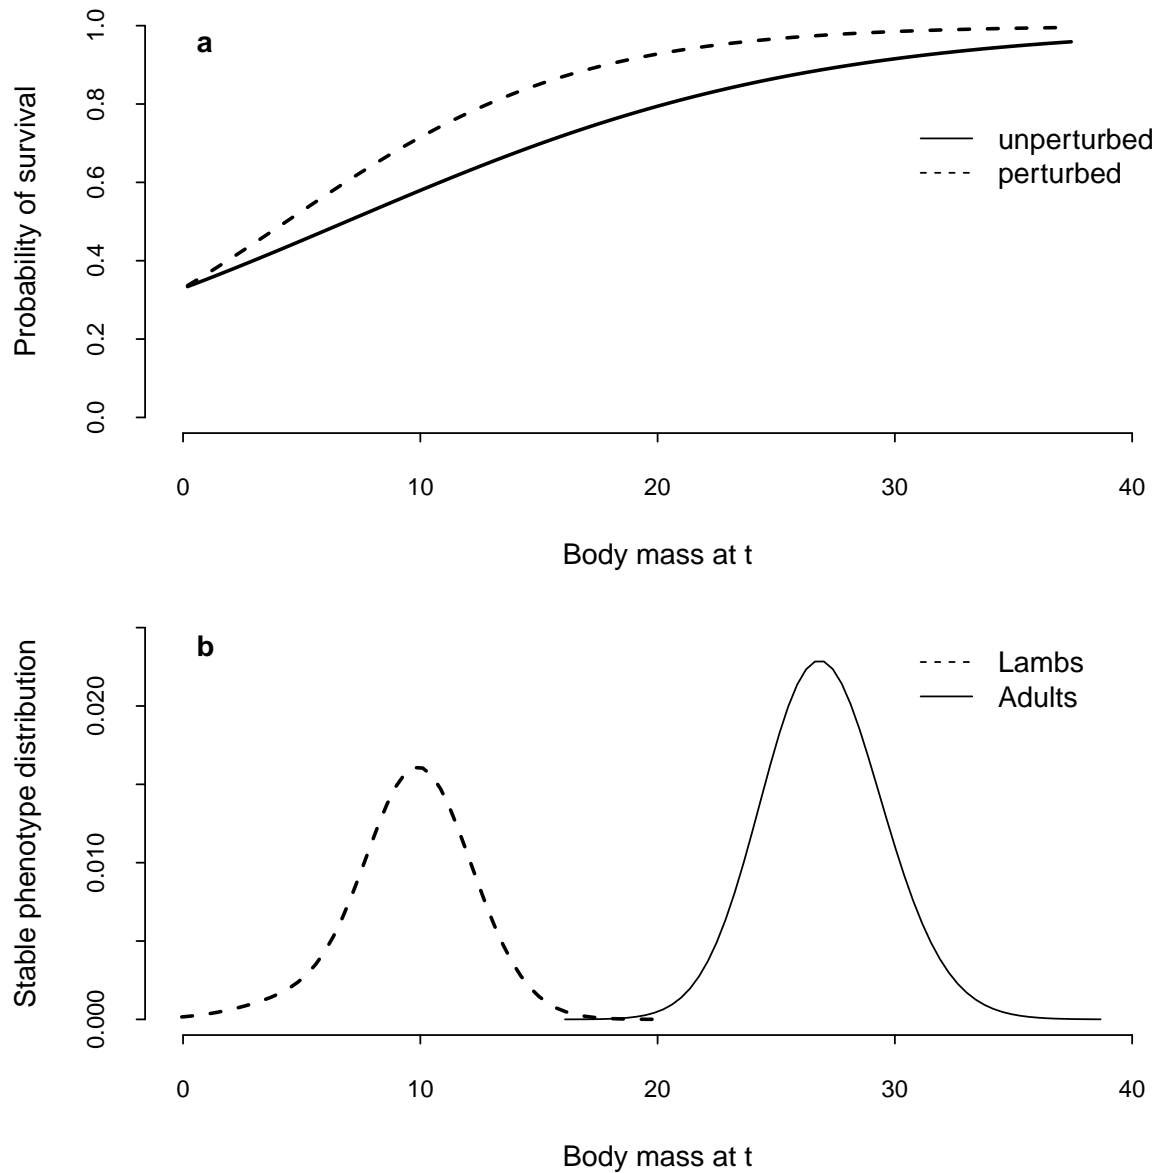

Figure S3: Schematic of the linearisation effect using a linearised survival function as an example. The effect of perturbing the slope of the survival function (a) on viability selection depends on the phenotype distribution (b). The same perturbation in (a) makes survival probabilities less equal across the lamb phenotype values and more equal across the adult phenotype values (b). Therefore the same perturbation increases viability selection for lambs and decreases viability selection for adults.
